# Supplementary material for: Effect of ortho-substitution on persulfate-mediated decarboxylation and functionalization of arylacetic acids
Source: Royal Society of Chemistry journal article supplement (doi:10.1039/d3nj02776g), 2023-01-01

## Supporting Information

### Effect of *ortho*-substitution on persulfate mediated decarboxylation and functionalization of arylacetic acids

Joydev K. Laha, \*Upma Gulati and Saima

*Department of Pharmaceutical Technology (Process Chemistry)*

*National Institute of Pharmaceutical Education and Research*

*S. A. S. Nagar, Punjab 160062, India*

*E-mail: [jlaha@niper.ac.in](mailto:jlaha@niper.ac.in)*

#### Table of contents

|                                         |        |
|-----------------------------------------|--------|
| I. Experimental procedure               | S1-S2  |
| II. Characterization data of substrates | S2-S5  |
| III. References                         | S6     |
| IV. Copies of NMR spectra of substrates | S7-S38 |

## General considerations

Unless noted otherwise, all reagents and solvents were purchased from commercial sources and used as received. All reactions were performed in a screw capped vial. All reaction temperatures correspond to oil bath temperatures. The proton ( $^1\text{H}$ ) and carbon ( $^{13}\text{C}$ ) NMR spectra were obtained using 400, 500 or 600 MHz and 100, 125 or 150 MHz respectively with  $\text{Me}_4\text{Si}$  as an internal standard and are reported in  $\delta$  units. Coupling constants ( $J$  values) are reported in hertz (Hz). Column chromatography was performed on silica gel (60-120 or 100-200 mesh). High resolution mass spectra (HRMS) was obtained using Electron Spray Ionization (ESI) technique and as TOF mass analyzer. All melting points were taken using a melting point apparatus equipped with a calibrated thermometer. New compounds were characterized by melting point,  $^1\text{H}$  NMR,  $^{13}\text{C}$  NMR, IR and HRMS data.

## I. Experimental Procedure

### General procedure for the synthesis of benzofuranone (3)

In an oven-dried screw capped vial equipped with a magnetic stir bar, a solution of 2-hydroxyphenylacetic acid (**1**) (0.5 mmol),  $\text{K}_2\text{S}_2\text{O}_8$  (2 equiv) and DCE (2 mL) was heated at 80 °C for 12 h. After complete consumption of the starting material, monitored through TLC, the reaction mixture was extracted using dichloromethane. Organic layers were collected, washed with saturated solution of  $\text{NaHCO}_3$ ; dried over  $\text{Na}_2\text{SO}_4$ , concentrated under reduced pressure, and purified using column chromatography (100–200 mesh silica, EtOAc: hexane = 3.0: 7.0) to obtain the desired product.

### General procedure for the synthesis of 2-(2-hydroxyphenyl)-*N*-phenylacetamide derivatives (5a-5k)

In an oven-dried screw capped vial equipped with a magnetic stir bar, a solution of 2-hydroxyphenylacetic acid (**1**) (0.5 mmol), substituted aniline (**4a-4k**) (1 equiv),  $\text{K}_2\text{S}_2\text{O}_8$  (2 equiv) and DCE (2 mL) was heated at 80 °C for 12 h. After complete consumption of the starting material, monitored through TLC, the reaction mixture was extracted using dichloromethane. Organic layers were collected, washed with saturated solution of  $\text{NaHCO}_3$ ; dried over  $\text{Na}_2\text{SO}_4$ , concentrated under reduced pressure, and purified using column chromatography (100–200 mesh silica, EtOAc: hexane = 3.0: 7.0) to obtain the desired product.

### General procedure for the synthesis of 1-(2,6-dichlorophenyl)indolin-2-one (9)

In an oven-dried screw capped vial equipped with a magnetic stir bar, a solution of diclofenac (**7**) (0.5 mmol),  $K_2S_2O_8$  (2 equiv) and DCE (2 mL) was heated at 80 °C for 12 h. After complete consumption of the starting material, monitored through TLC, the reaction mixture was extracted using dichloromethane. Organic layers were collected, washed with saturated solution of  $NaHCO_3$ ; dried over  $Na_2SO_4$ , concentrated under reduced pressure, and purified using column chromatography (100–200 mesh silica, EtOAc: hexane = 3.0: 7.0) to obtain the desired product.

### General procedure for the synthesis of isobenzofuranone (**11**)

In an oven-dried screw capped vial equipped with a magnetic stir bar, a solution of homophthalic acid (0.5 mmol),  $K_2S_2O_8$  (2 equiv) and DCE (2 mL) was heated at 80 °C for 12 h. After complete consumption of the starting material, monitored through TLC, the reaction mixture was extracted using dichloromethane. Organic layers were collected, washed with saturated solution of  $NaHCO_3$ ; dried over  $Na_2SO_4$ , concentrated under reduced pressure, and purified using column chromatography (100–200 mesh silica, EtOAc: hexane = 3.0: 7.0) to obtain the desired product.

## II. Characterization data of substrates:

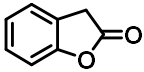 Benzofuran-2(3H)-one (**3**)<sup>1</sup>: Pale yellow solid; yield 84% (56 mg) (for 0.5 mmol); <sup>1</sup>H NMR (500 MHz, DMSO-*d*<sub>6</sub>): 7.32 (d, *J* = 7.3 Hz, 1H), 7.27 (t, *J* = 7.7 Hz, 1H), 7.14–7.09 (m, 2H), 3.88 (s, 2H); <sup>13</sup>C NMR (125 MHz, DMSO-*d*<sub>6</sub>): δ 175.0, 154.6, 128.8, 125.3, 124.9, 124.3, 110.6, 33.1.

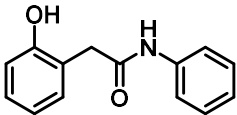 2-(2-Hydroxyphenyl)-*N*-phenylacetamide (**5a**): Off-white shiny solid; m. p. 172–173 °C, yield 85% (96 mg) (for 0.5 mmol); <sup>1</sup>H NMR (600 MHz, CDCl<sub>3</sub>): 8.81 (s, 1H), 7.70 (bs, 1H), 7.47 (d, *J* = 7.6 Hz, 2H), 7.34–7.26 (m, 2H), 7.19 (t, *J* = 7.4 Hz, 1H), 7.15–7.11 (m, 2H), 6.97 (d, *J* = 8.0 Hz, 1H), 6.88 (dt, *J* = 7.4, 1.0 Hz, 1H), 3.73 (s, 2H); <sup>13</sup>C NMR (150 MHz, CDCl<sub>3</sub>): δ 171.3, 155.6, 136.9, 130.6, 129.3, 129.0, 125.2, 121.1, 120.7, 120.3, 117.8, 41.9. HR-MS (ESI) [M+Na]<sup>+</sup>: *m/z* calc. for C<sub>14</sub>H<sub>13</sub>NNaO<sub>2</sub><sup>+</sup> 250.0858 found 250.0853.

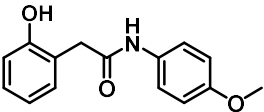 2-(2-Hydroxyphenyl)-*N*-(4-methoxyphenyl)acetamide (**5b**): Off-white shiny solid; mp: 141–142 °C; yield 84% (108 mg) (for 0.5 mmol); <sup>1</sup>H NMR (600 MHz, DMSO-*d*<sub>6</sub>): 9.87 (s, 1H), 9.47 (s, 1H), 7.48 (d, *J* = 9.0 Hz, 2H), 7.10 (d, *J* = 7.3 Hz, 1H), 7.02 (t, *J* = 7.6 Hz, 1H), 6.83 (d,

$J = 8.8$  Hz, 2H), 6.76 (d,  $J = 7.9$  Hz, 1H), 6.71 (t,  $J = 7.4$  Hz, 1H), 3.67 (s, 3H), 3.53 (s, 2H);  $^{13}\text{C}$  NMR (150 MHz, DMSO- $d_6$ ):  $\delta$  169.0, 155.3, 155.0, 132.5, 130.8, 127.6, 122.5, 120.5, 118.8, 114.9, 113.7, 55.1, 37.8. HR-MS (ESI)  $[\text{M}+\text{Na}]^+$ :  $m/z$  calc. for  $\text{C}_{15}\text{H}_{15}\text{NNaO}_3^+$  280.0944 found 280.0954.

*N*-(4-Bromophenyl)-2-(2-hydroxyphenyl)acetamide (**5c**): Slight brown shiny solid; mp: 174-

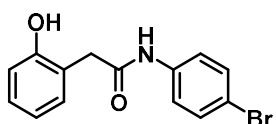

175 °C; yield 81% (123 mg) (for 0.5 mmol);  $^1\text{H}$  NMR (600 MHz, DMSO- $d_6$ ): 10.16 (s, 1H), 9.45 (s, 1H), 7.55 (d,  $J = 7.6$  Hz, 2H), 7.43 (d,  $J = 7.0$  Hz, 2H), 7.08 (d,  $J = 7.3$  Hz, 1H), 7.02 (t,  $J = 8.7$  Hz, 1H),

6.75 (dd,  $J = 8.2, 1.1$  Hz, 1H), 6.70 (t,  $J = 7.4$  Hz, 1H), 3.55 (s, 2H);  $^{13}\text{C}$  NMR (150 MHz, DMSO- $d_6$ ):  $\delta$  169.6, 155.3, 138.7, 131.4, 130.9, 127.7, 122.2, 120.8, 118.7, 114.8, 114.4, 37.9. HR-MS (ESI)  $[\text{M}+\text{Na}]^+$ :  $m/z$  calc. for  $\text{C}_{14}\text{H}_{12}\text{BrNNaO}_2^+$  327.9944 found 327.9951.

*N*-(4-Chlorophenyl)-2-(2-hydroxyphenyl)acetamide (**5d**): White shiny solid; mp: 144-145 °C;

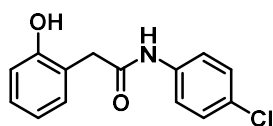

yield 79% (103 mg) (for 0.5 mmol);  $^1\text{H}$  NMR (600 MHz, DMSO- $d_6$ ): 10.14 (s, 1H), 9.44 (s, 1H), 7.61-7.59 (m, 2H), 7.30 (d,  $J = 8.4$  Hz, 2H), 7.10-7.01 (m, 2H), 6.76-6.70 (m, 2H), 3.56 (s, 2H);  $^{13}\text{C}$  NMR (150 MHz, DMSO- $d_6$ ):  $\delta$  171.2, 156.9, 139.9, 132.5, 130.1,

129.3, 128.0, 123.9, 122.1, 120.3, 116.4, 39.4. HR-MS (ESI)  $[\text{M}+\text{Na}]^+$ :  $m/z$  calc. for  $\text{C}_{14}\text{H}_{12}\text{ClNNaO}_2^+$  284.0449 found 284.0454.

2-(2-Hydroxyphenyl)-*N*-(*o*-tolyl)acetamide (**5e**): Orangish-brown solid; mp: 153-154 °C;

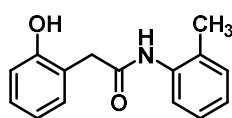

yield 84% (101 mg) (for 0.5 mmol);  $^1\text{H}$  NMR (600 MHz, DMSO- $d_6$ ): 9.63 (s, 1H), 9.23 (s, 1H), 7.43 (d,  $J = 7.8$  Hz, 1H), 7.14 (t,  $J = 7.9$  Hz, 2H), 7.10 (t,  $J = 7.5$  Hz, 1H), 7.05-7.00 (m, 2H) 6.79 (d,  $J = 7.9$  Hz,

1H), 6.72 (t,  $J = 7.3$  Hz, 1H), 3.58 (s, 2H), 2.14 (s, 3H);  $^{13}\text{C}$  NMR (150 MHz, DMSO- $d_6$ ):  $\delta$  169.3, 155.1, 136.3, 130.8, 130.7, 130.1, 127.6, 125.8, 124.7, 124.2, 122.4, 118.8, 114.8, 37.7, 17.5. HR-MS (ESI)  $[\text{M}+\text{Na}]^+$ :  $m/z$  calc. for  $\text{C}_{15}\text{H}_{15}\text{NNaO}_2^+$  264.0995 found 264.1005.

*N*-(2-Bromophenyl)-2-(2-hydroxyphenyl)acetamide (**5f**): Black viscous liquid; yield 71%

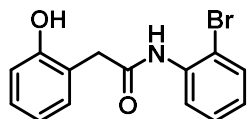

(108 mg) (for 0.5 mmol);  $^1\text{H}$  NMR (600 MHz, DMSO- $d_6$ ): 9.75 (s, 1H), 9.17 (s, 1H), 7.80 (d,  $J = 7.9$  Hz, 1H), 7.58 (dd,  $J = 8.1, 1.3$  Hz, 1H), 7.31 (dt,  $J = 8.4, 1.3$  Hz, 1H), 7.16 (d,  $J = 7.2$  Hz, 1H), 7.07-7.02 (m, 2H), 6.81 (d,  $J = 8.0$  Hz, 1H), 6.74 (dt,  $J = 7.3, 0.9$  Hz, 1H), 3.61

(s, 2H);  $^{13}\text{C}$  NMR (150 MHz, DMSO- $d_6$ ):  $\delta$  170.0, 155.6, 136.6, 132.9, 131.3, 128.6, 128.5, 126.5, 125.1, 122.2, 119.5, 115.4, 38.5. HR-MS (ESI)  $[\text{M}+\text{Na}]^+$ :  $m/z$  calc. for  $\text{C}_{14}\text{H}_{12}\text{BrNNaO}_2^+$  327.9944 found 327.9949.

*N*-(3-Chlorophenyl)-2-(2-hydroxyphenyl)acetamide (**5g**): Black viscous liquid; yield 75%

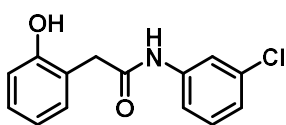

(98 mg) (for 0.5 mmol);  $^1\text{H}$  NMR (600 MHz, DMSO- $d_6$ ): 10.21 (s, 1H), 9.45 (s, 1H), 7.79 (s, 1H), 7.42-7.41 (m, 1H), 7.28 (dt,  $J$  = 8.1, 1.2 Hz, 1H), 7.08 (d,  $J$  = 7.4 Hz, 1H), 7.05-7.01 (m, 2H), 6.75 (d,  $J$  = 7.9 Hz, 1H), 6.70 (dt,  $J$  = 7.3, 0.8 Hz, 1H), 3.55 (s, 2H);  $^{13}\text{C}$  NMR (150 MHz, DMSO- $d_6$ ):  $\delta$  171.4, 156.8, 142.4, 134.6, 132.5, 131.9, 129.3, 124.2, 123.7, 120.3, 119.9, 118.8, 116.3, 39.4. HR-MS (ESI)  $[\text{M}+\text{Na}]^+$ :  $m/z$  calc. for  $\text{C}_{14}\text{H}_{12}\text{ClNNaO}_2^+$  284.0449 found 284.0451.

2-(2-Hydroxyphenyl)-*N*-(3-nitrophenyl)acetamide (**5h**): Yellowish-brown shiny solid; mp:

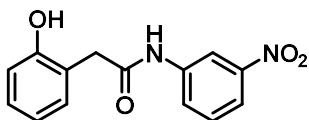

178-180  $^\circ\text{C}$ ; yield 81% (110 mg) (for 0.5 mmol);  $^1\text{H}$  NMR (600 MHz, DMSO- $d_6$ ): 10.53 (s, 1H), 9.47 (s, 1H), 8.62 (s, 1H), 7.89-7.88 (m, 1H), 7.86-7.84 (m, 1H), 7.56 (dt,  $J$  = 8.2, 0.7 Hz, 1H), 7.10 (dd,  $J$  = 7.5, 1.3 Hz, 1H), 7.04 (dt,  $J$  = 7.7, 1.5 Hz, 1H), 6.76 (dd,  $J$  = 7.9, 0.7 Hz, 1H), 6.71 (dt,  $J$  = 7.3, 0.6 Hz, 1H), 3.60 (s, 2H);  $^{13}\text{C}$  NMR (150 MHz, DMSO- $d_6$ ):  $\delta$  170.2, 155.3, 147.9, 140.4, 131.0, 130.1, 127.8, 124.9, 122.0, 118.7, 117.5, 114.7, 113.0, 37.9. HR-MS (ESI)  $[\text{M}+\text{Na}]^+$ :  $m/z$  calc. for  $\text{C}_{14}\text{H}_{12}\text{N}_2\text{NaO}_4^+$  295.0689 found 295.0698.

*N*-(3,5-Dimethylphenyl)-2-(2-hydroxyphenyl)acetamide (**5i**): Dark yellow viscous liquid;

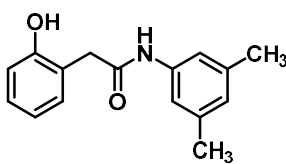

yield 87% (111 mg) (for 0.5 mmol);  $^1\text{H}$  NMR (600 MHz, DMSO- $d_6$ ): 9.86 (s, 1H), 9.48 (s, 1H), 7.22 (s, 2H), 7.11 (dd,  $J$  = 7.3, 1.1 Hz, 1H), 7.05 (dt,  $J$  = 7.6, 1.5 Hz, 1H), 6.79 (d,  $J$  = 7.5 Hz, 1H), 6.74 (t,  $J$  = 7.4 Hz, 1H), 6.66 (s, 1H), 3.56 (s, 2H), 2.21 (s, 6H);  $^{13}\text{C}$  NMR (150 MHz, DMSO- $d_6$ ):  $\delta$  170.9, 156.7, 140.6, 139.0, 132.2, 129.1, 126.0, 124.0, 120.2, 118.3, 116.3, 39.4, 22.5. HR-MS (ESI)  $[\text{M}+\text{Na}]^+$ :  $m/z$  calc. for  $\text{C}_{16}\text{H}_{17}\text{NNaO}_2^+$  278.1151 found 278.1156.

*N*-(4-chloro-3-(trifluoromethyl)phenyl)-2-(2-hydroxyphenyl)acetamide (**5j**): White solid; mp:

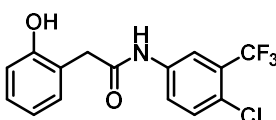

176-177  $^\circ\text{C}$ ; yield 81% (133 mg) (for 0.5 mmol);  $^1\text{H}$  NMR (600 MHz, DMSO- $d_6$ ): 10.45 (s, 1H), 9.44 (s, 1H), 8.19 (s, 1H), 7.80 (d,  $J$  = 8.7 Hz, 1H), 7.60 (d,  $J$  = 8.8 Hz, 1H), 7.10 (d,  $J$  = 7.3 Hz, 1H), 7.03 (t,  $J$  = 7.8 Hz, 1H), 6.76 (dd,  $J$  = 8.0, 1.4 Hz, 1H), 6.71 (t,  $J$  = 7.4 Hz, 1H), 3.58 (s, 2H);  $^{13}\text{C}$

NMR (150 MHz, DMSO-*d*<sub>6</sub>):  $\delta$  171.8, 156.9, 140.4, 133.6, 132.6, 129.4, 125.2, 125.1, 123.5, 120.3, 119.15, 119.11, 116.3, 39.4. HR-MS (ESI) [M+Na]<sup>+</sup>: *m/z* calc. for C<sub>15</sub>H<sub>11</sub>ClF<sub>3</sub>NNaO<sub>2</sub><sup>+</sup> 352.0323 found 352.0327.

2-(2-hydroxyphenyl)-*N*-(naphthalene-1-yl)acetamide (**5k**): White solid; mp: 130-131 °C; yield

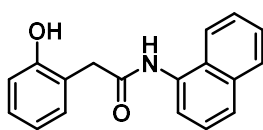

79% (109 mg) (for 0.5 mmol); <sup>1</sup>H NMR (600 MHz, DMSO-*d*<sub>6</sub>): 9.94 (s, 1H), 9.62 (s, 1H), 8.06-8.05 (m, 1H), 7.90-7.89 (m, 1H), 7.71 (d, *J* = 8.1 Hz, 1H), 7.66 (d, *J* = 7.3 Hz, 1H), 7.51-7.49 (m, 2H), 7.44 (t, *J* = 7.8 Hz, 1H), 7.18 (d, *J* = 7.2 Hz, 1H), 7.05 (dt, *J* = 7.9, 1.3 Hz, 1H), 6.81 (d, *J* = 7.9 Hz, 1H), 6.74 (t, *J* = 7.2 Hz, 1H), 3.73 (s, 2H); <sup>13</sup>C NMR (150 MHz, DMSO-*d*<sub>6</sub>):  $\delta$  171.8, 157.0, 135.3, 132.6, 129.7, 129.3, 127.5, 127.4, 127.1, 126.7, 124.3, 124.2, 122.9, 120.5, 116.6, 39.5. HR-MS (ESI) [M+Na]<sup>+</sup>: *m/z* calc. for C<sub>18</sub>H<sub>15</sub>NNaO<sub>2</sub><sup>+</sup> 300.0995 found 300.1002.

1-(2,6-dichlorophenyl)indolin-2-one (**9**): Dark yellow viscous liquid; yield 68% (94 mg) (for

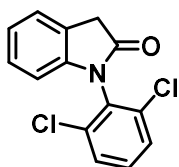

0.5 mmol); <sup>1</sup>H NMR (500 MHz, DMSO-*d*<sub>6</sub>): 7.71 (d, *J* = 8.0 Hz, 2H), 7.59-7.56 (m, 1H), 7.34 (dd, *J* = 7.3, 0.5 Hz, 1H), 7.17 (t, *J* = 6.5 Hz, 1H), 7.05 (dt, *J* = 7.5, 1.0 Hz, 1H), 6.35 (d, *J* = 7.8 Hz, 1H), 3.85 (s, 2H); <sup>13</sup>C NMR (125 MHz, DMSO-*d*<sub>6</sub>):  $\delta$  173.7, 143.3, 134.9, 132.4, 130.4, 129.9, 128.3, 125.5, 125.1, 123.3, 109.0, 35.6. HR-MS (ESI) [M+Na]<sup>+</sup>: *m/z* calc. for C<sub>14</sub>H<sub>9</sub>Cl<sub>2</sub>NNaO<sup>+</sup> 299.9953 found 299.9958.

Isobenzofuran-1(3*H*)-one (**11**)<sup>2</sup>: white solid; yield 95% (64 mg) (for 0.5 mmol);

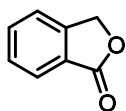

<sup>1</sup>H NMR (500 MHz, CDCl<sub>3</sub>):  $\delta$  7.96-7.95 (m, 1H), 7.71-7.69 (m, 1H), 7.58-7.52 (m, 2H), 5.35 (s, 2H); <sup>13</sup>C NMR (125 MHz, CDCl<sub>3</sub>):  $\delta$  171.1, 146.5, 134.0, 129.0, 125.8, 125.7, 122.1, 69.6.

2-Nitrotoluene (**15**)<sup>1</sup>: Colorless liquid; yield 21% (16 mg) (for 0.5 mmol); <sup>1</sup>H NMR

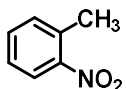

(500 MHz, CDCl<sub>3</sub>):  $\delta$  7.95 (d, *J* = 8.7 Hz, 1H), 7.49 (t, *J* = 7.5 Hz, 1H), 7.34-7.31 (m, 2H), 2.59 (s, 3H); <sup>13</sup>C NMR (125 MHz, CDCl<sub>3</sub>):  $\delta$  149.3, 133.6, 133.0, 132.8, 126.9, 124.7, 20.5.

1,2-Di([1,1'-biphenyl]-2-yl)ethane (**20**)<sup>3</sup>: white solid; yield 45% (75 mg)

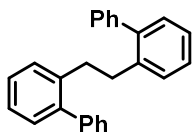

(for 0.5 mmol); <sup>1</sup>H NMR (400 MHz, CDCl<sub>3</sub>):  $\delta$  7.36 (s, 6H), 7.21-7.15 (m, 10H), 6.99 (s, 2H), 2.74 (s, 4H); <sup>13</sup>C NMR (100 MHz, CDCl<sub>3</sub>):  $\delta$  141.9, 141.7, 139.1, 129.9, 129.2, 129.1, 128.0, 127.3, 126.7, 125.7, 34.8.

### III. References

1. The data matches with that of the commercial sample obtained from Sigma Aldrich.
2. A. Cowell and J. K. Stille, *J. Am. Chem. Soc.* 1980, **102**, 4193.
3. J. K. Laha, U. Gulati, Saima; T. Schulte and M. Breugst, *J. Org. Chem.* 2022, **87**, 6638.

$^1\text{H}$  NMR (500 MHz,  $\text{DMSO-}d_6$ )

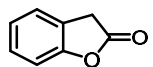

3

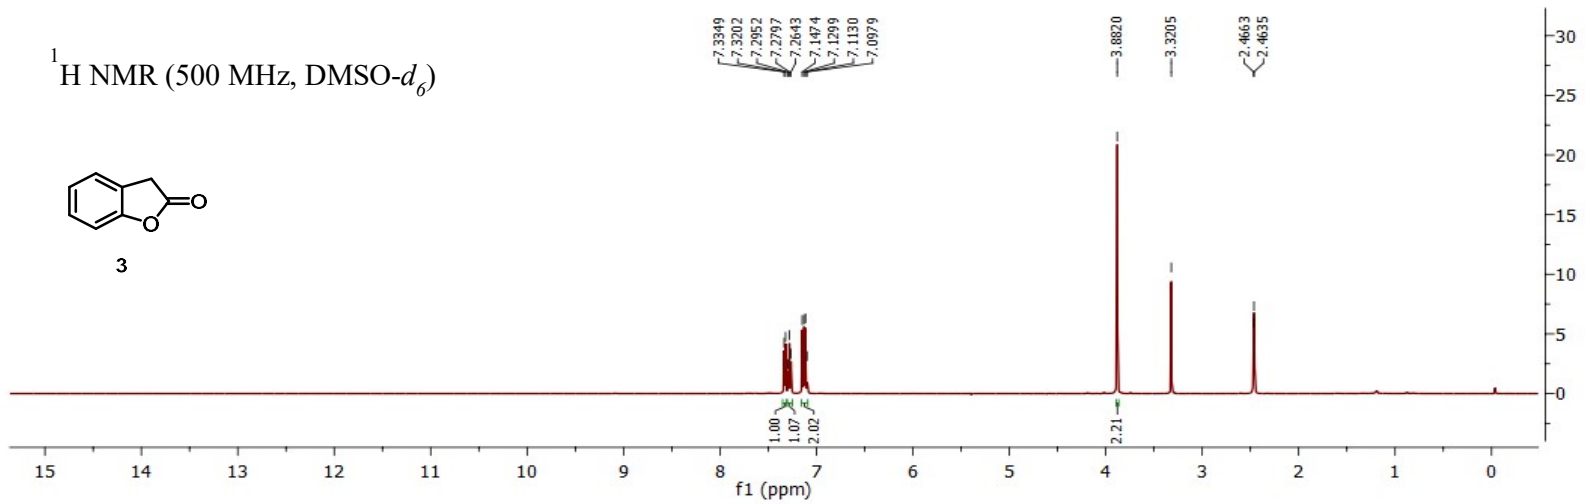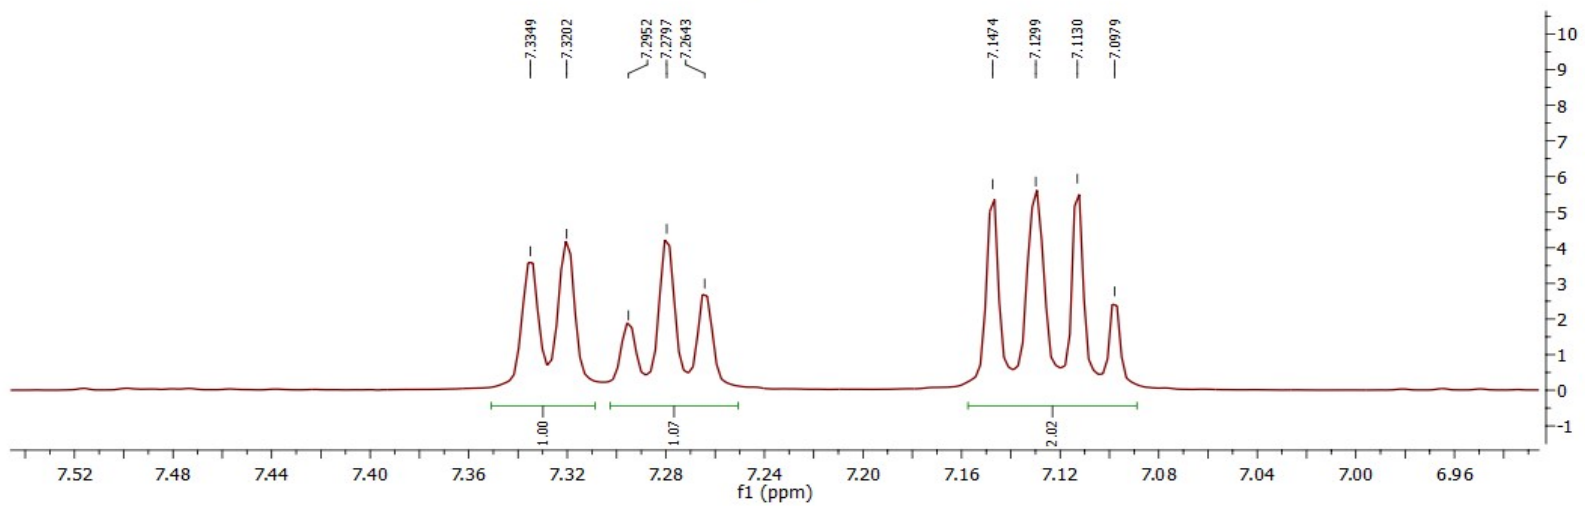



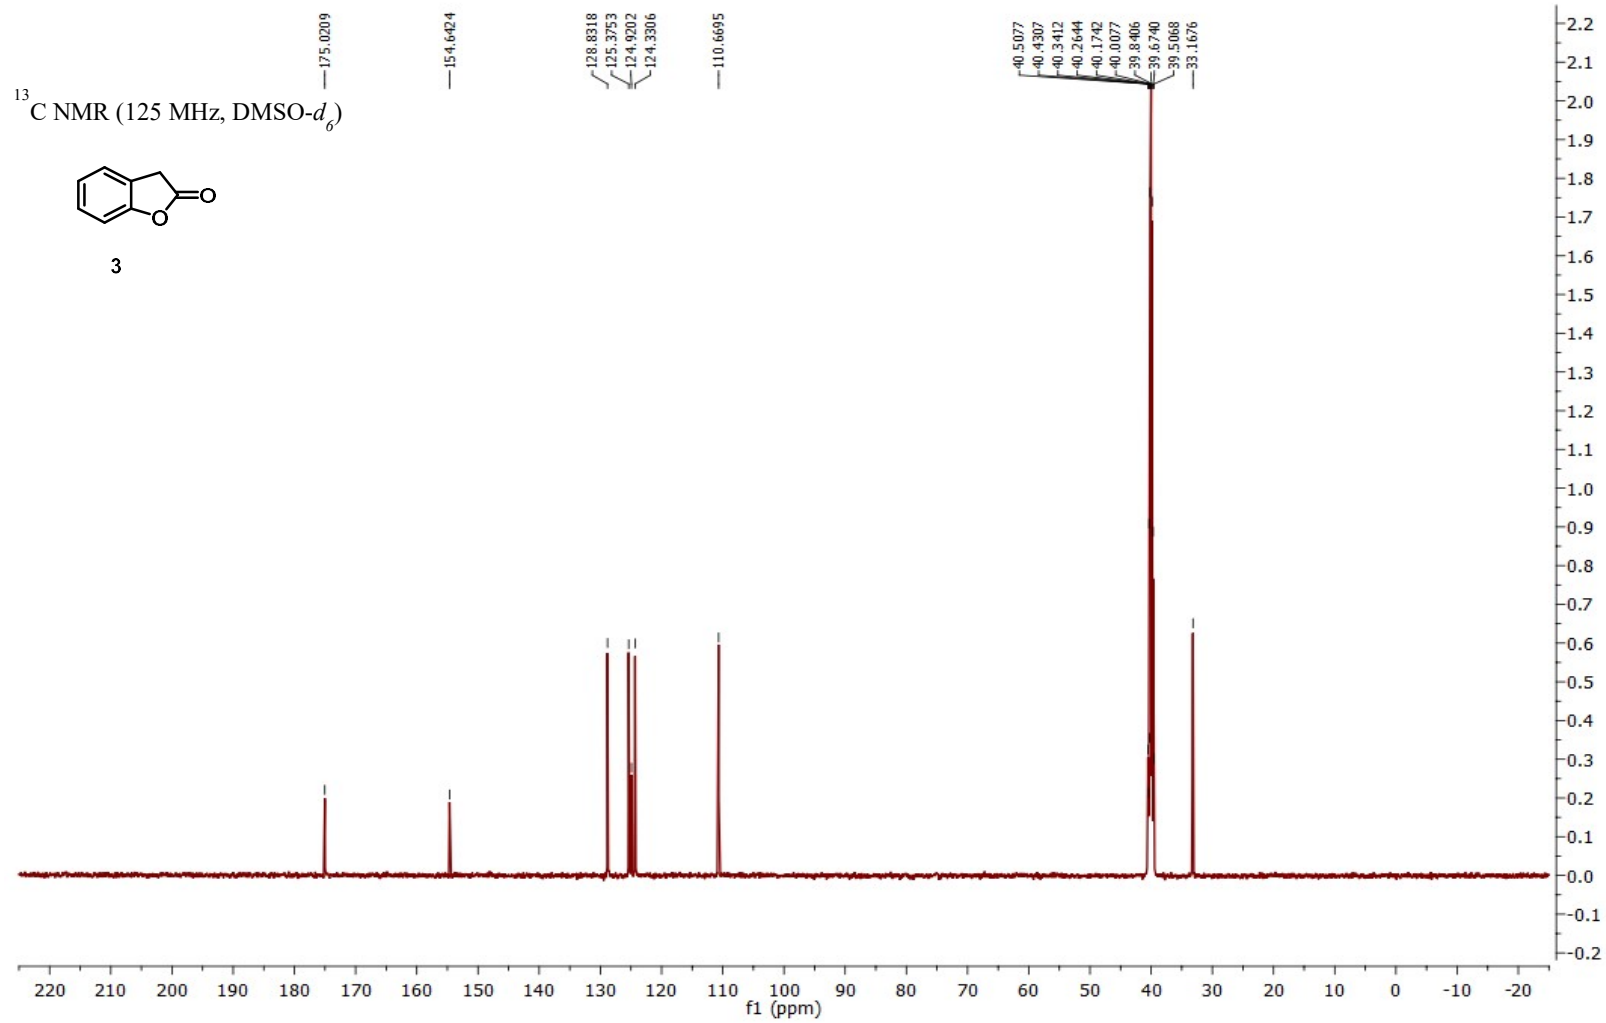

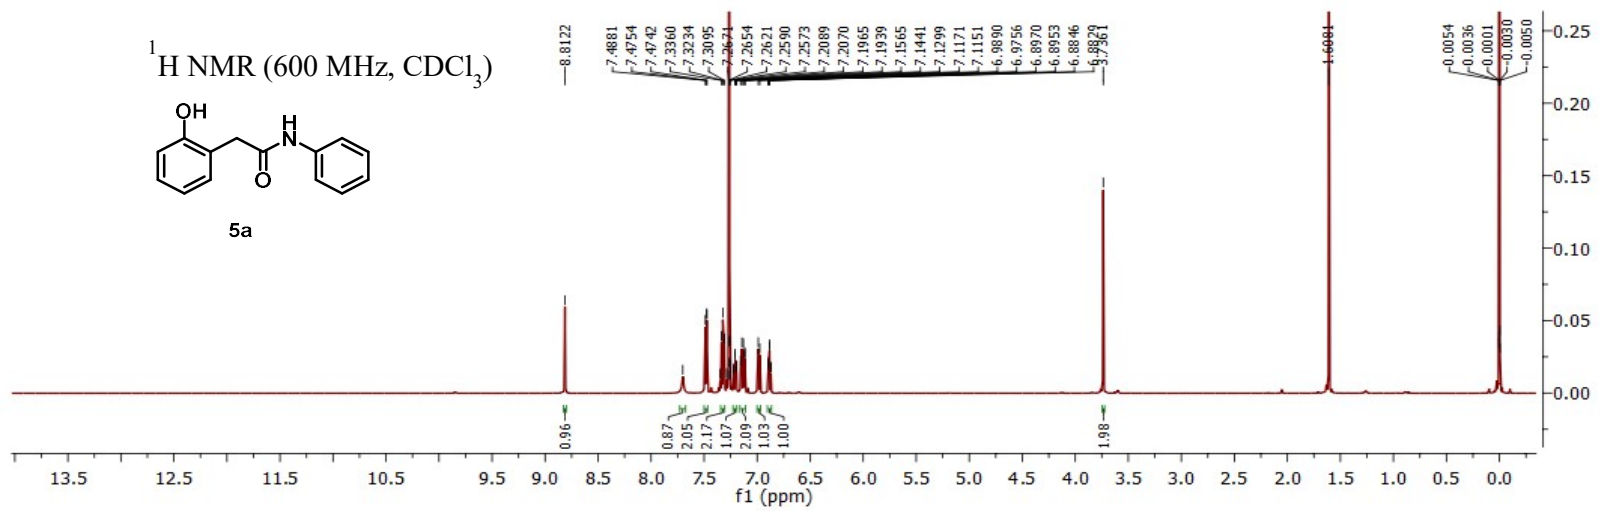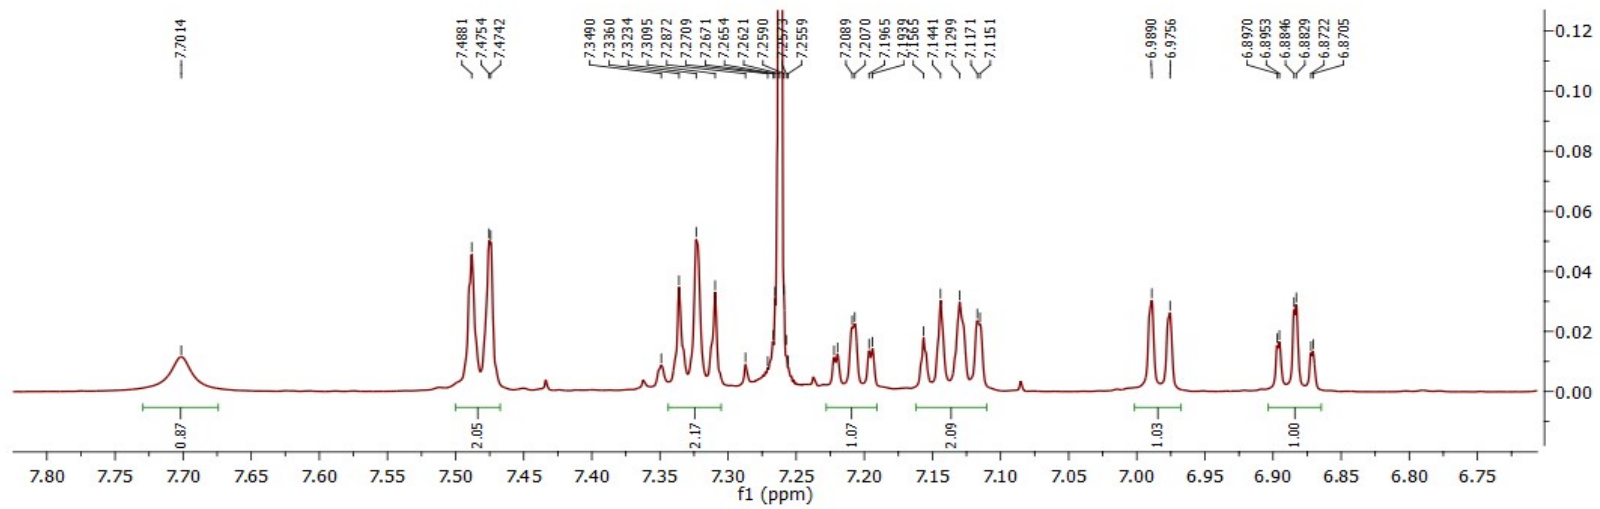

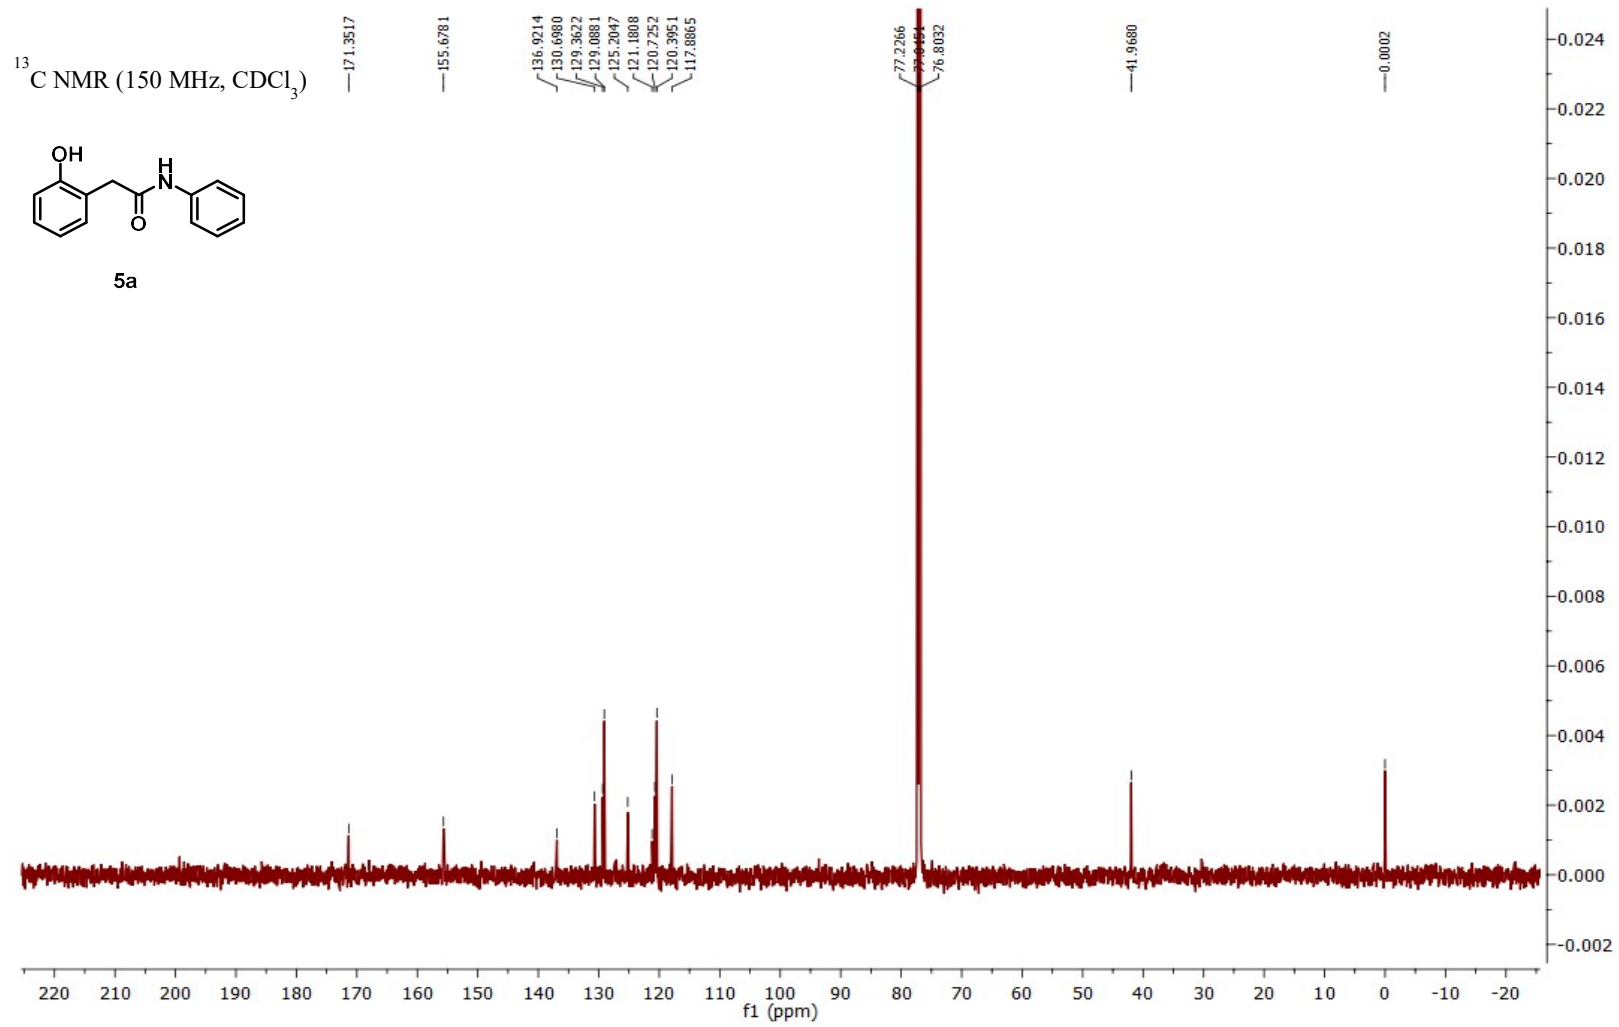

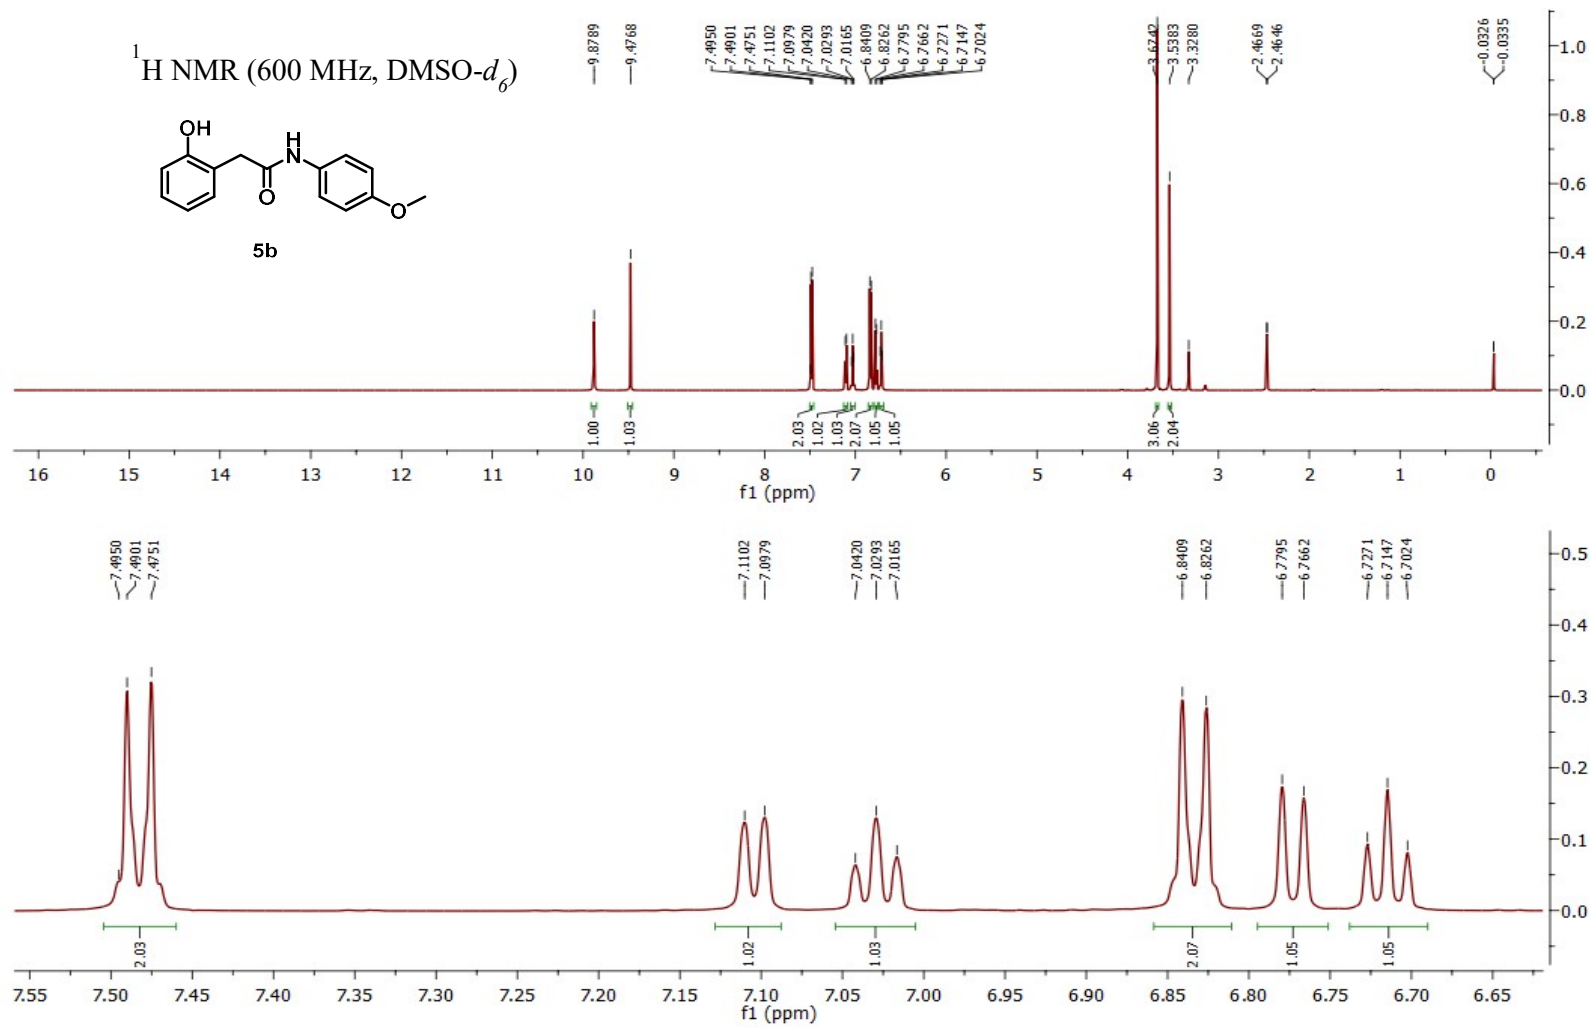

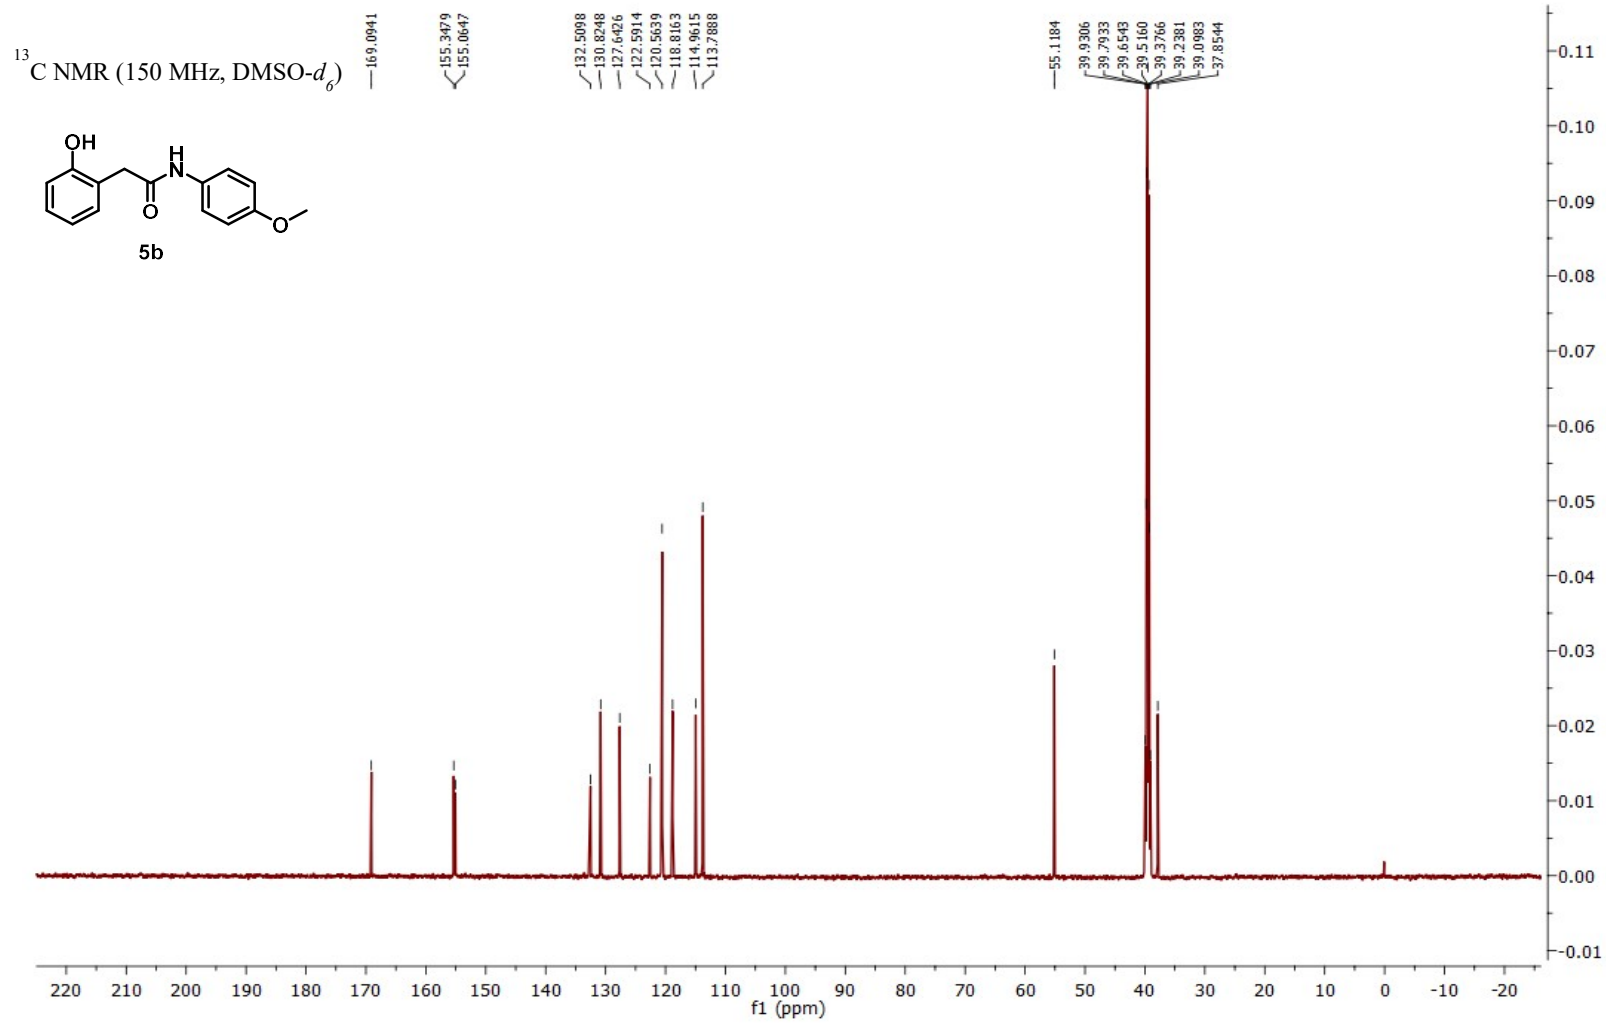

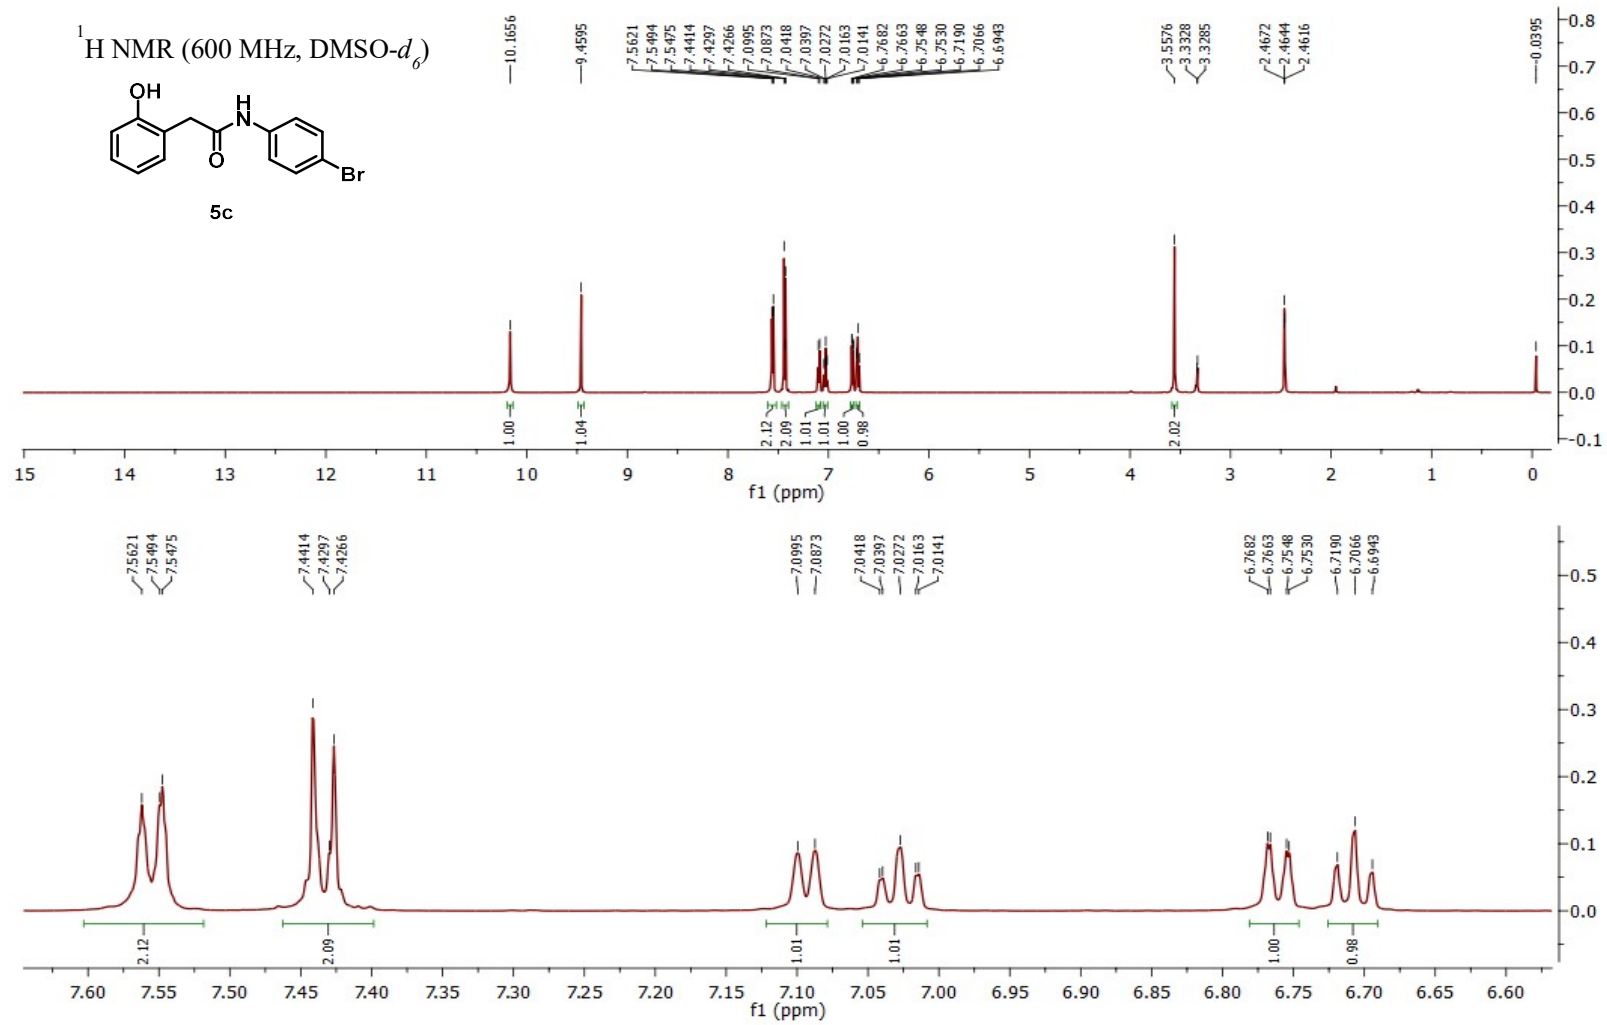

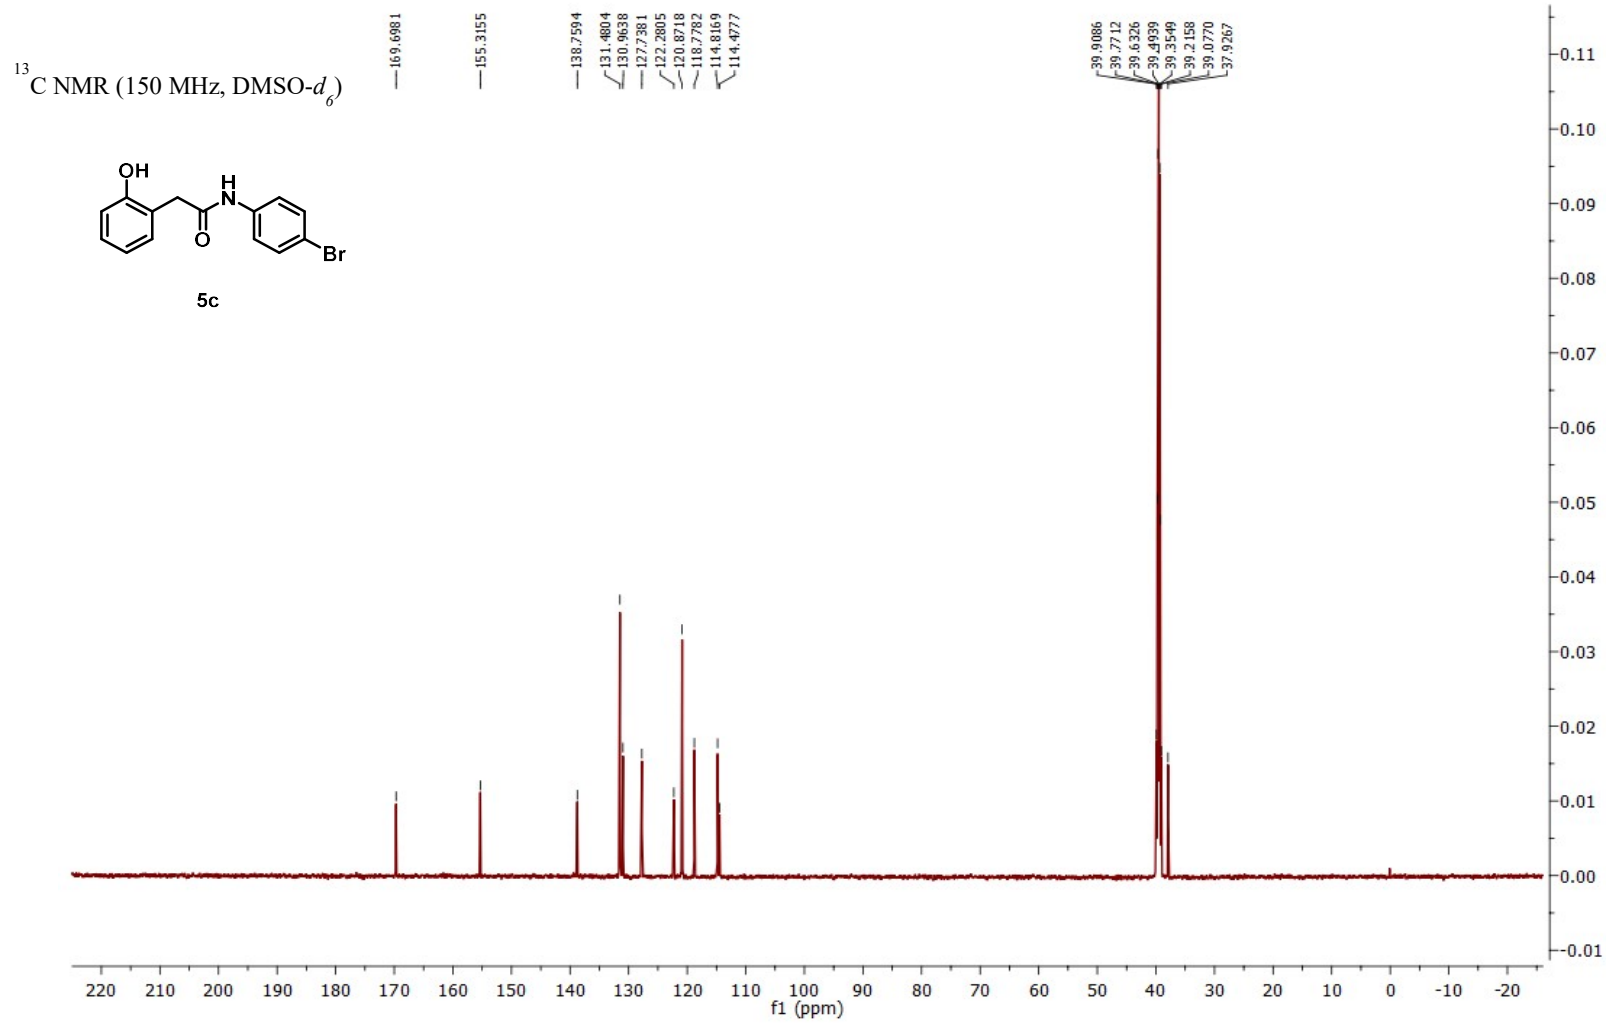

$^1\text{H}$  NMR (600 MHz,  $\text{DMSO-}d_6$ )

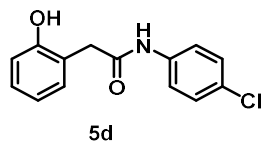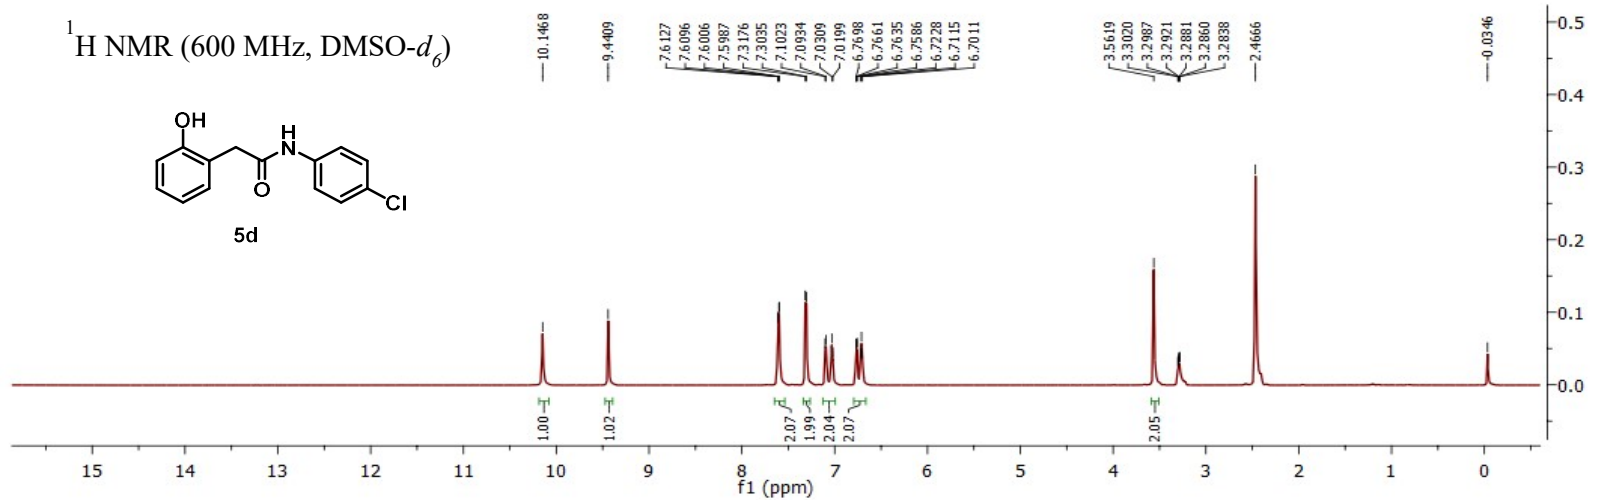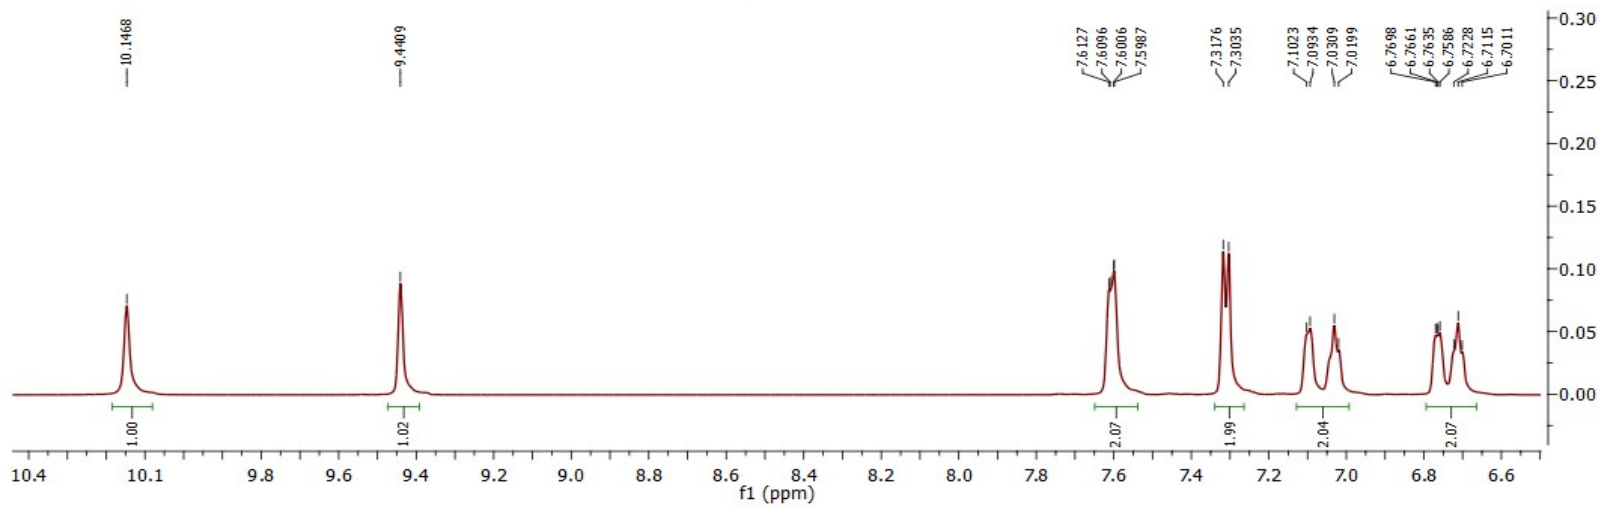



$^{13}\text{C}$  NMR (150 MHz,  $\text{DMSO-}d_6$ )

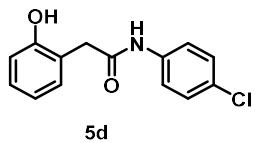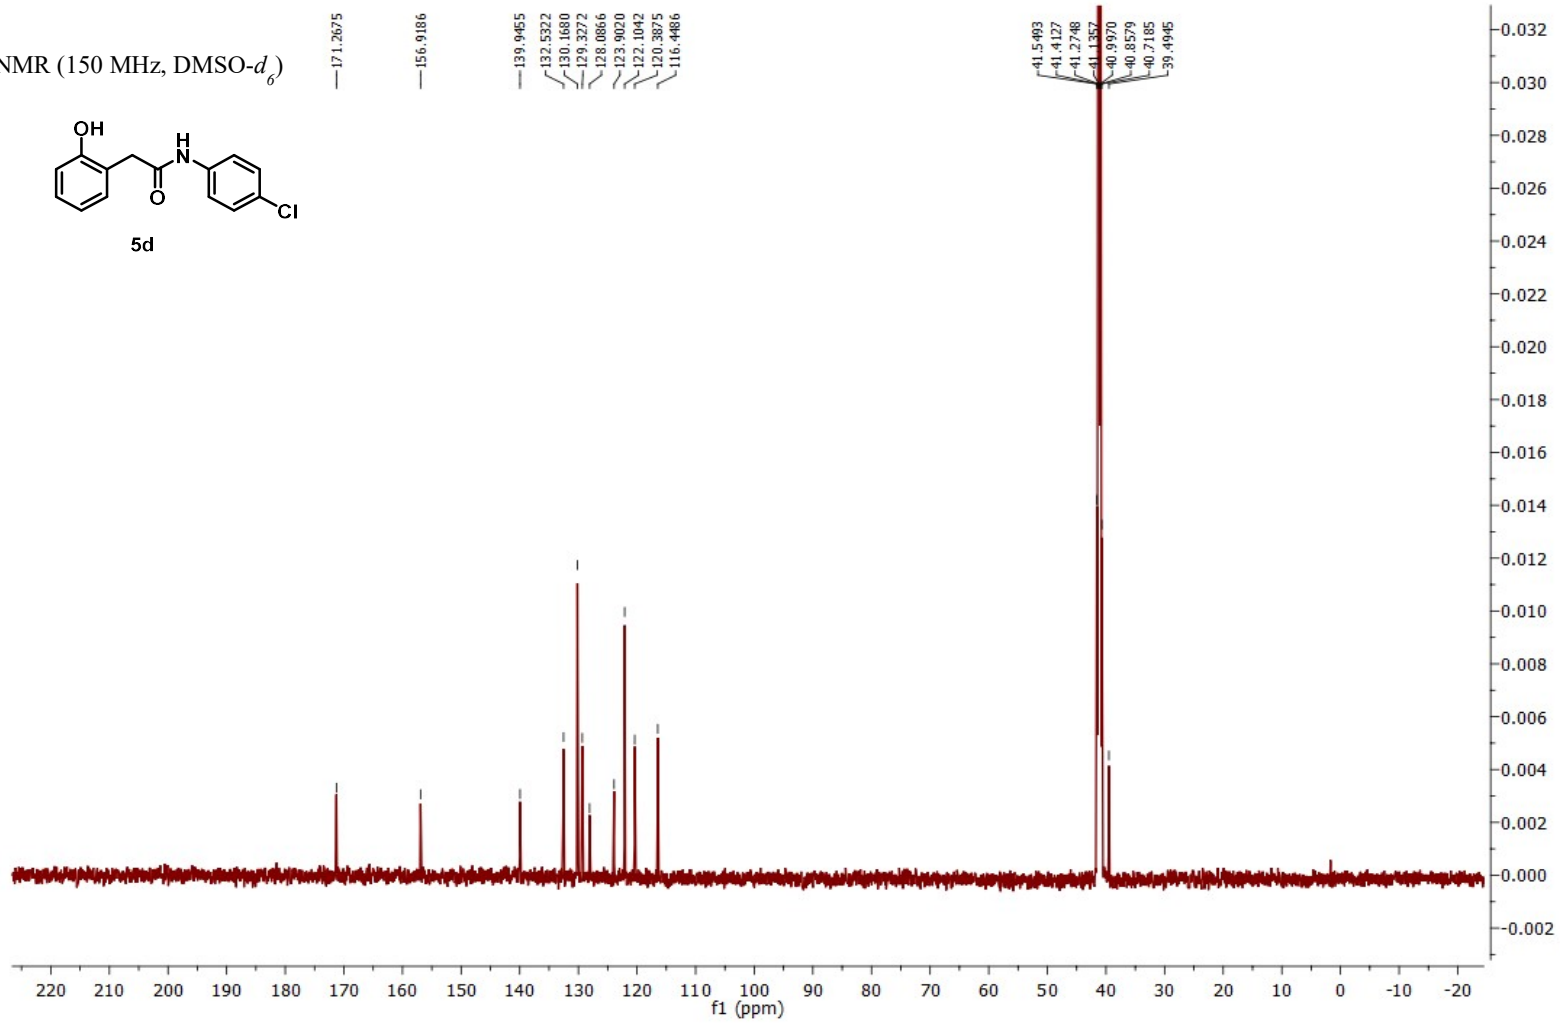

$^1\text{H}$  NMR (600 MHz,  $\text{DMSO-}d_6$ )

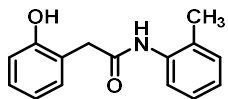

5e

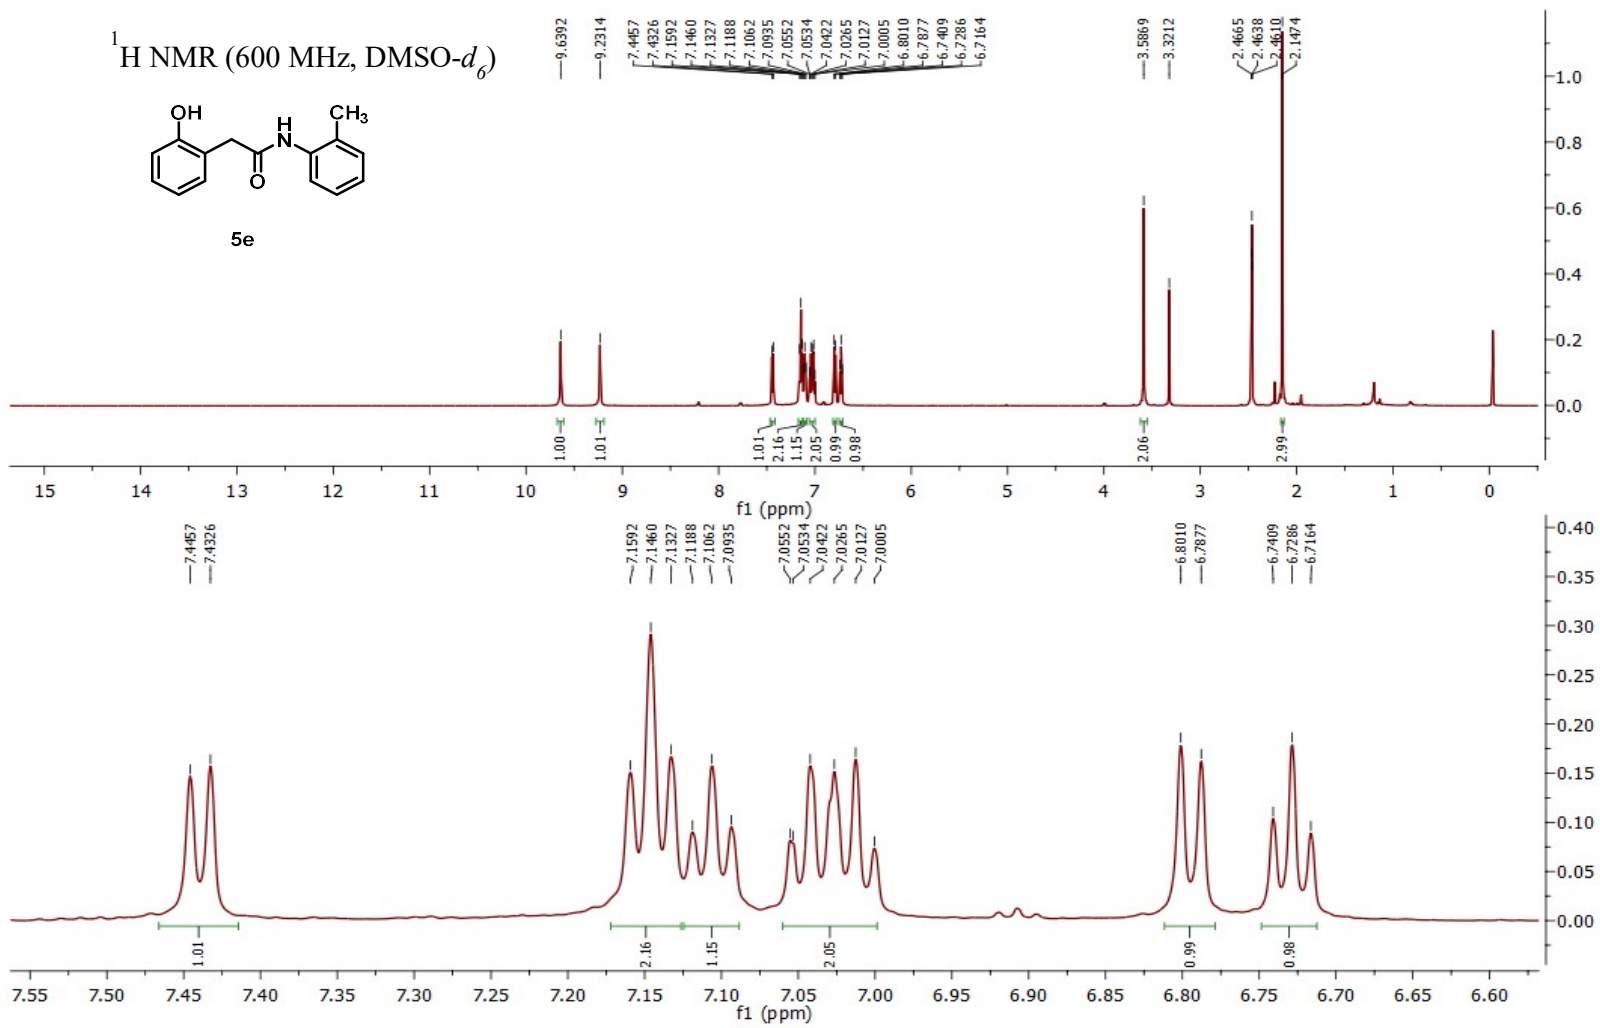

$^{13}\text{C}$  NMR (150 MHz,  $\text{DMSO-}d_6$ )

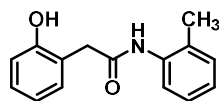

5e

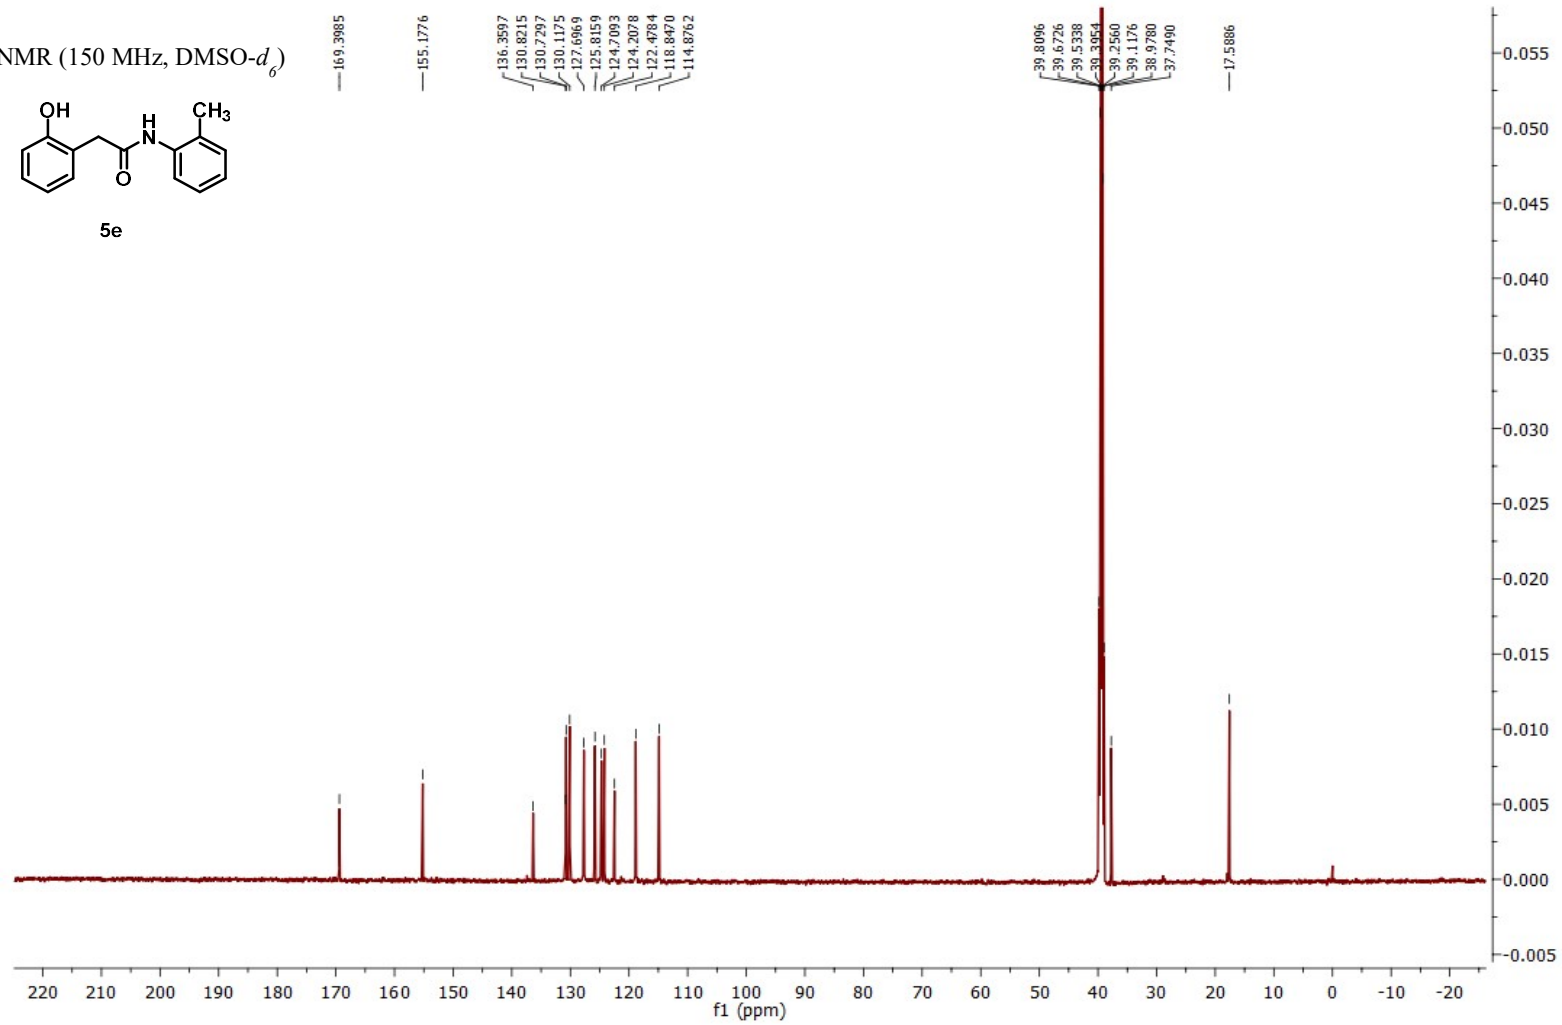

$^1\text{H}$  NMR (600 MHz,  $\text{DMSO-}d_6$ )

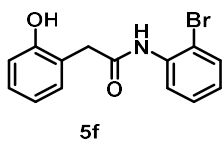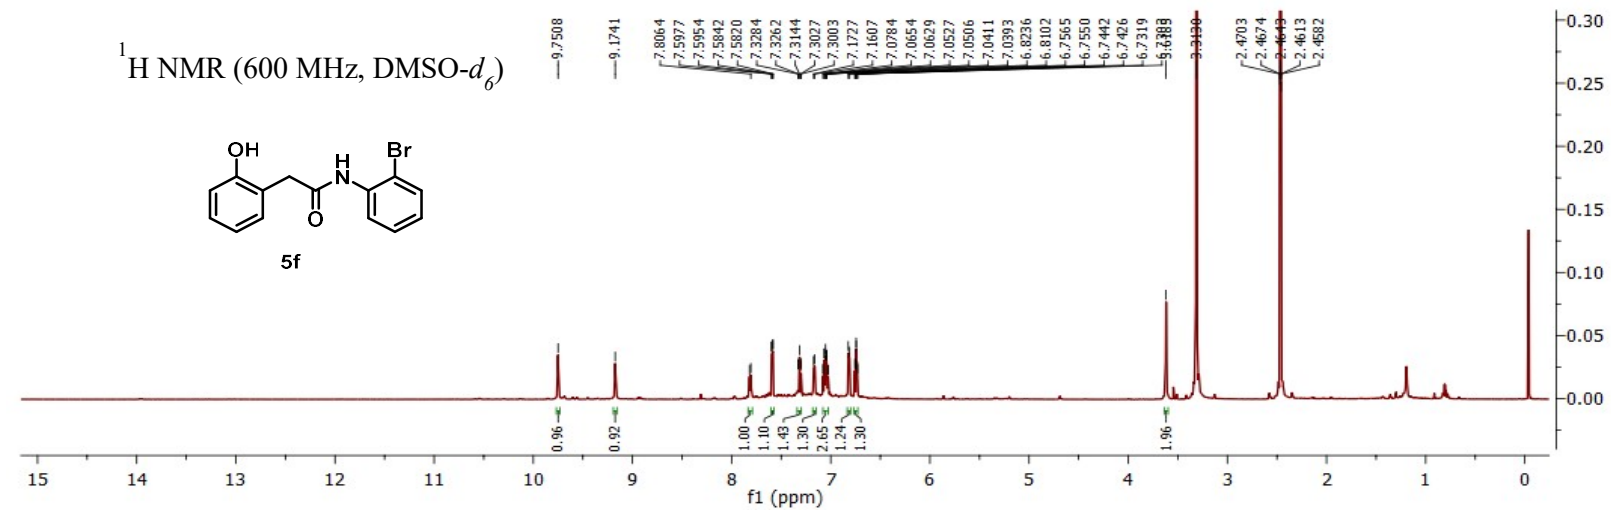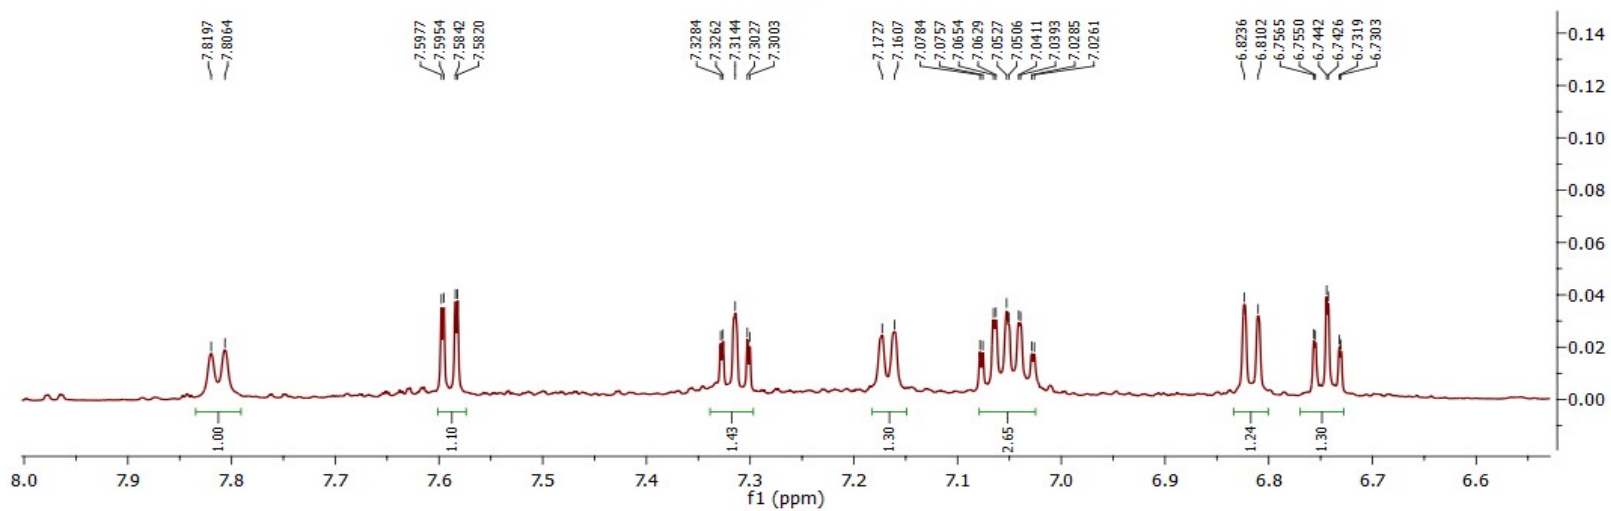

$^{13}\text{C}$  NMR (150 MHz,  $\text{DMSO-}d_6$ )

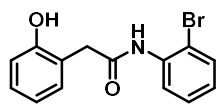

5f

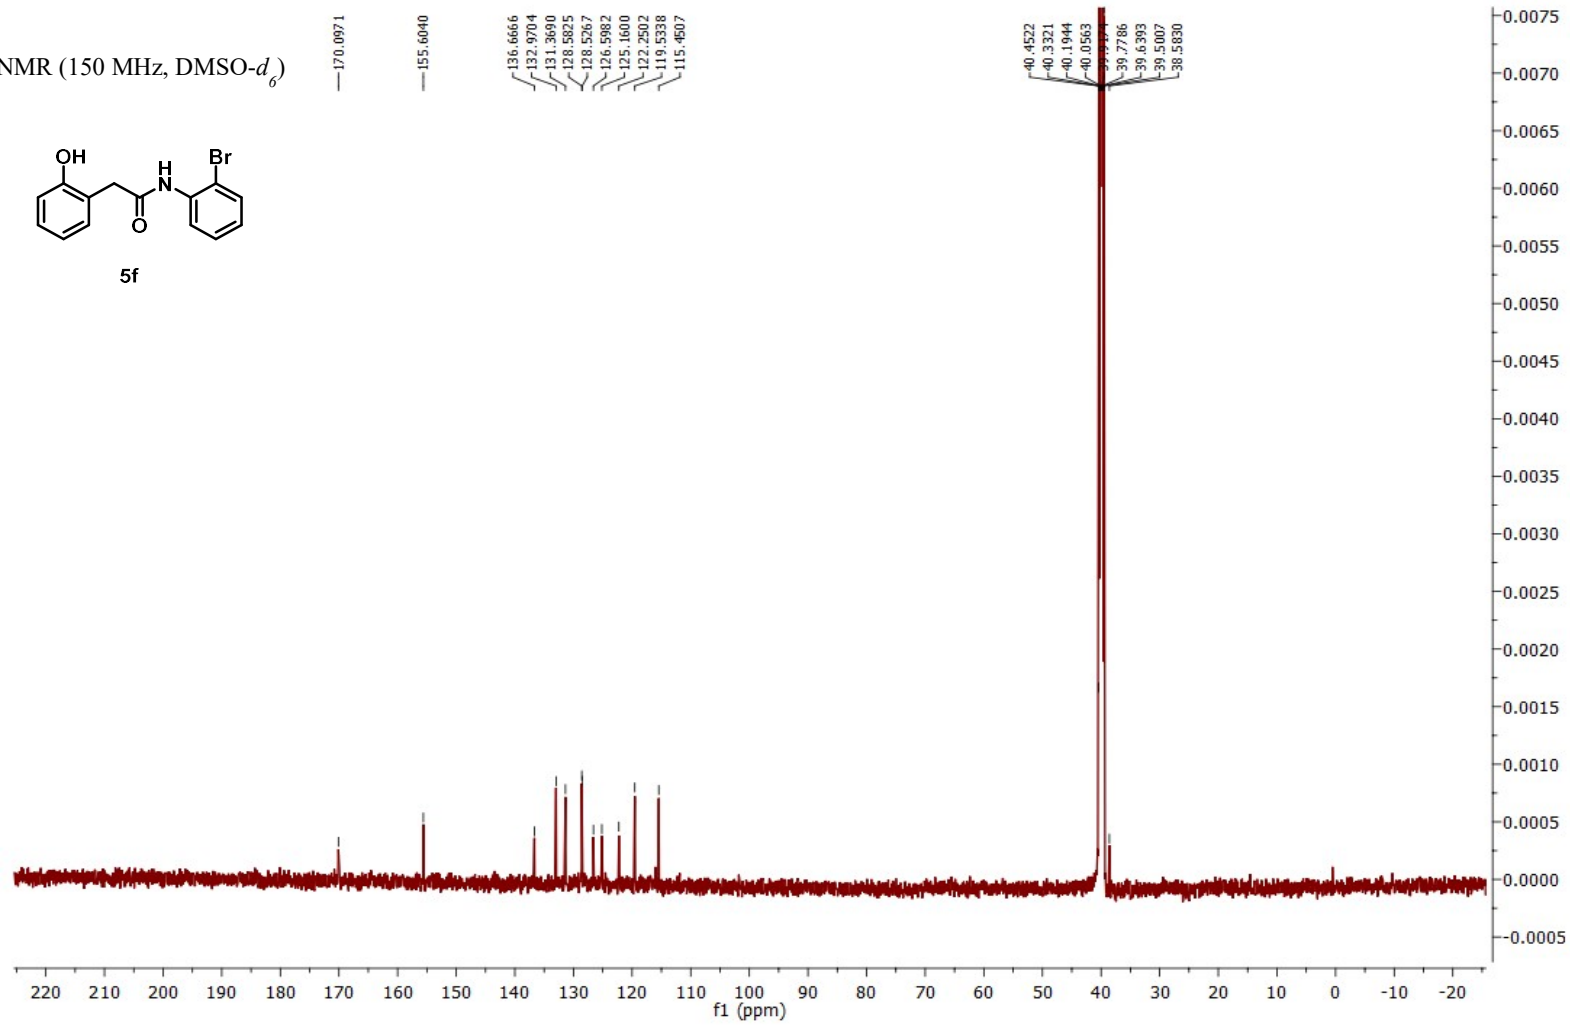



$^{13}\text{C}$  NMR (150 MHz,  $\text{DMSO-}d_6$ )

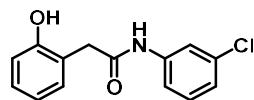

5g

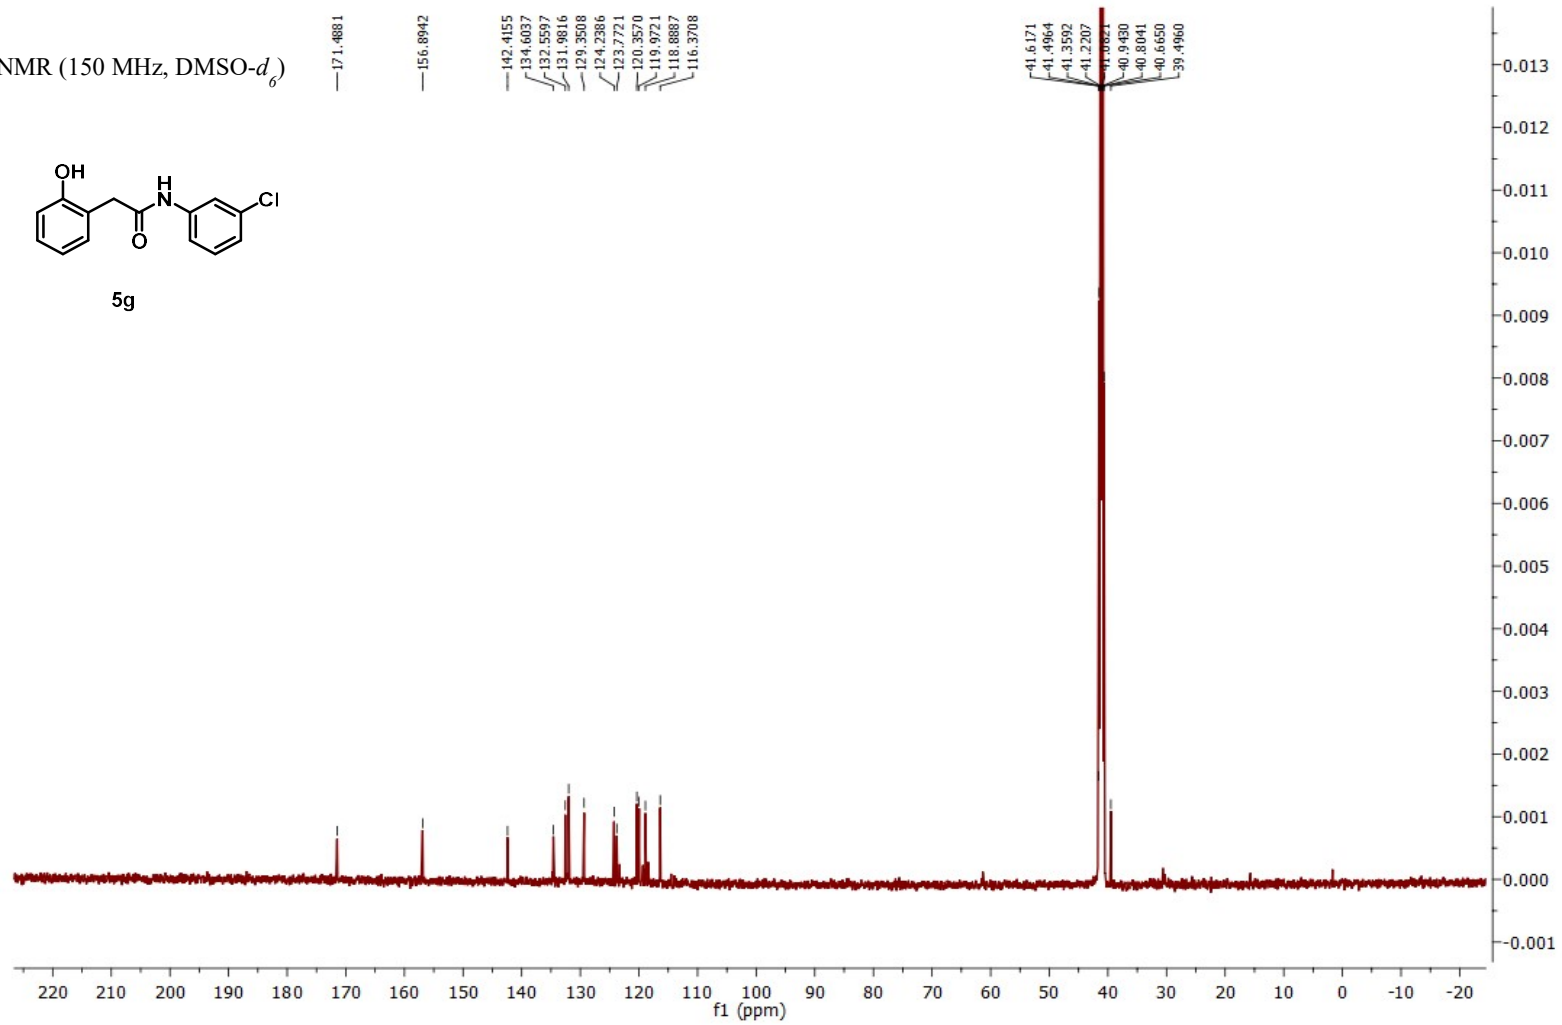

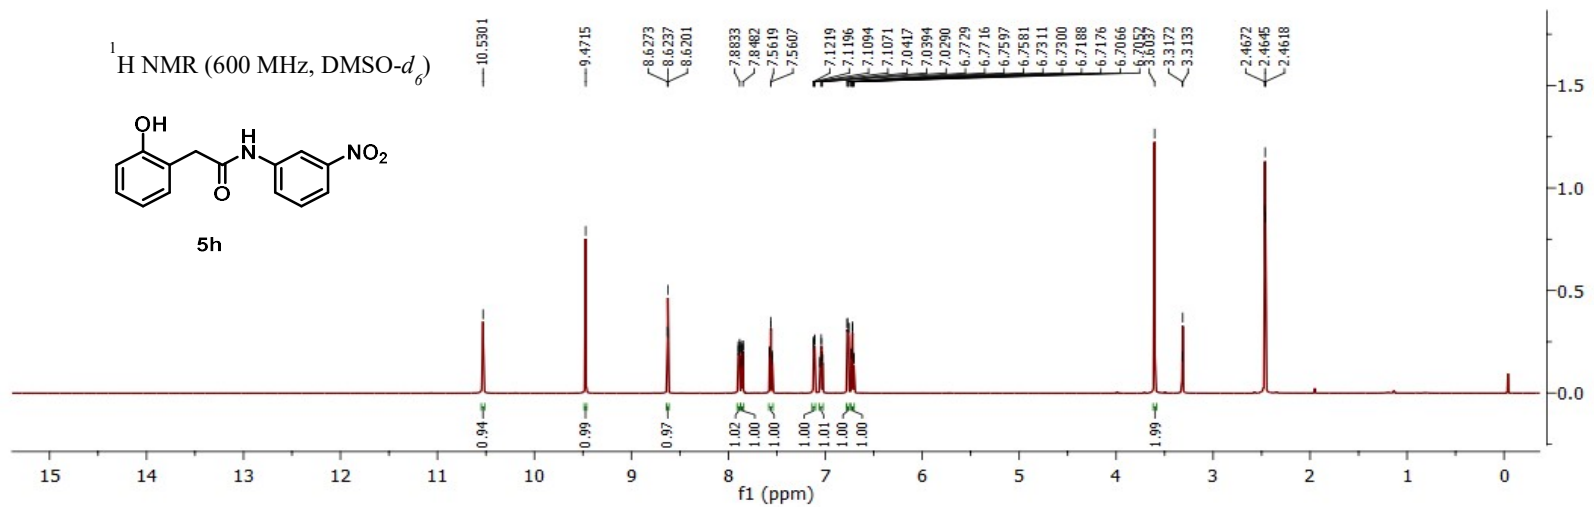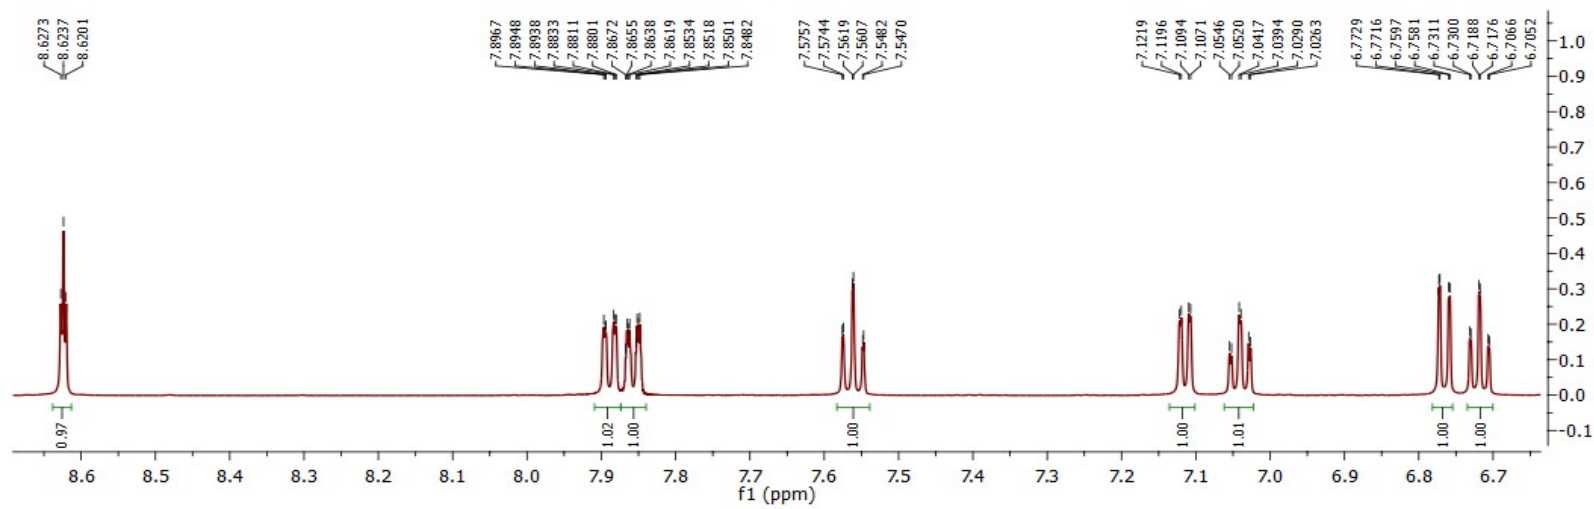



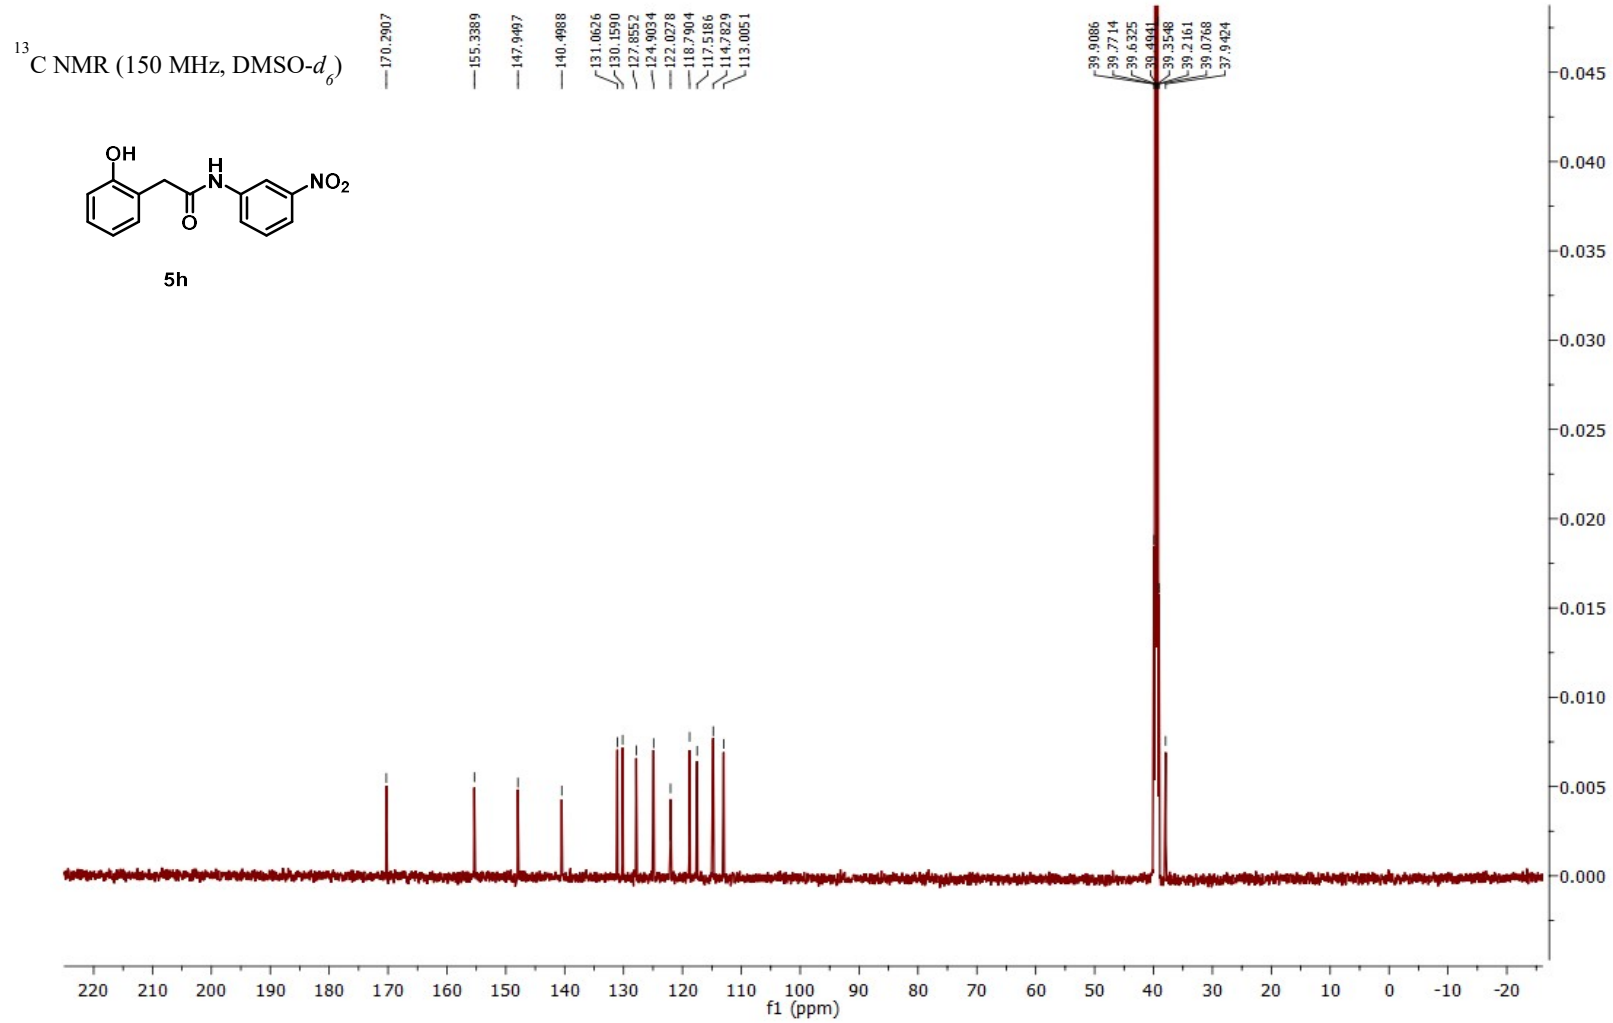

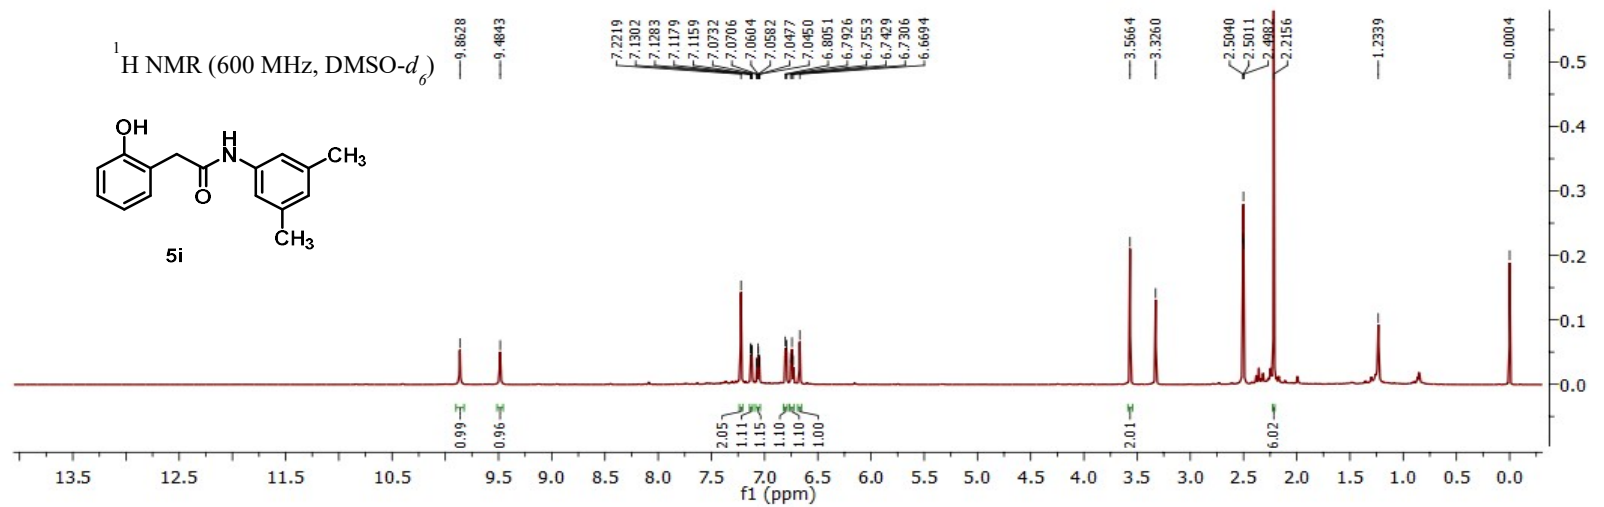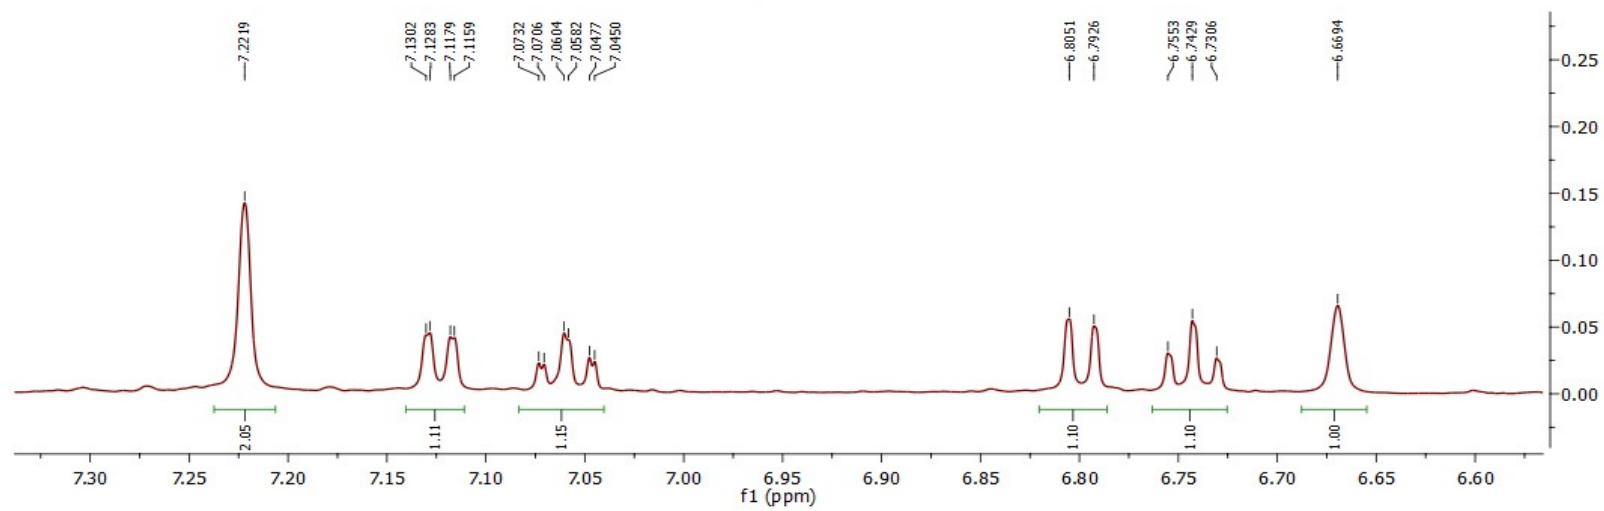

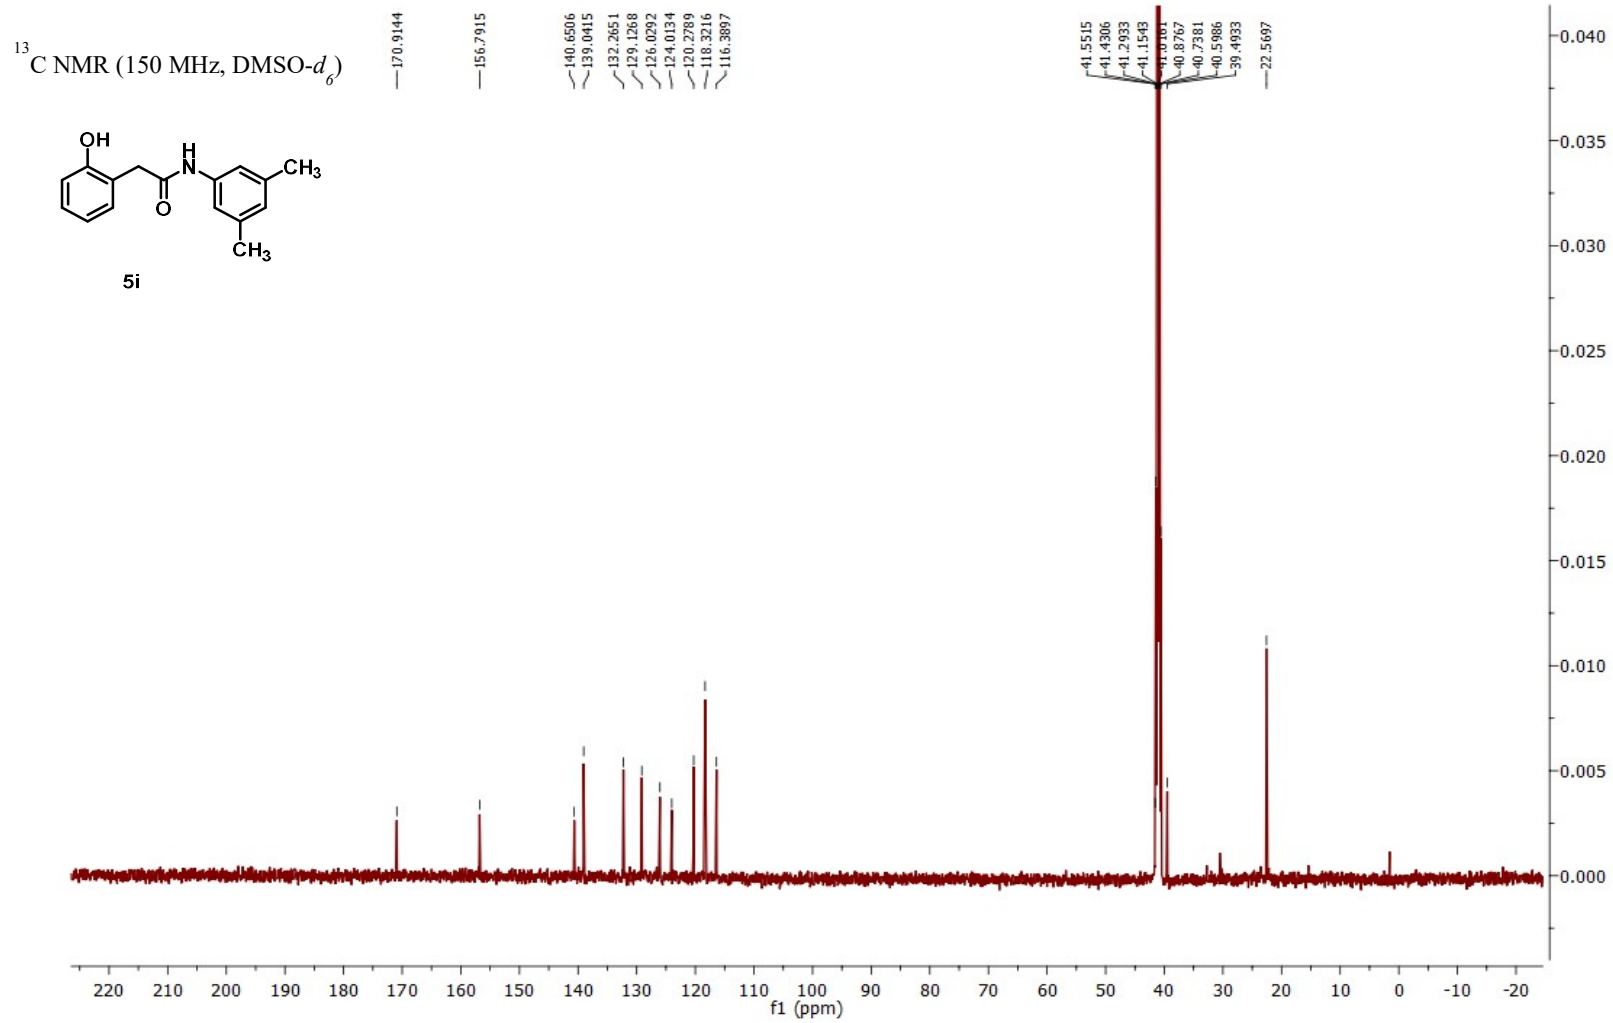

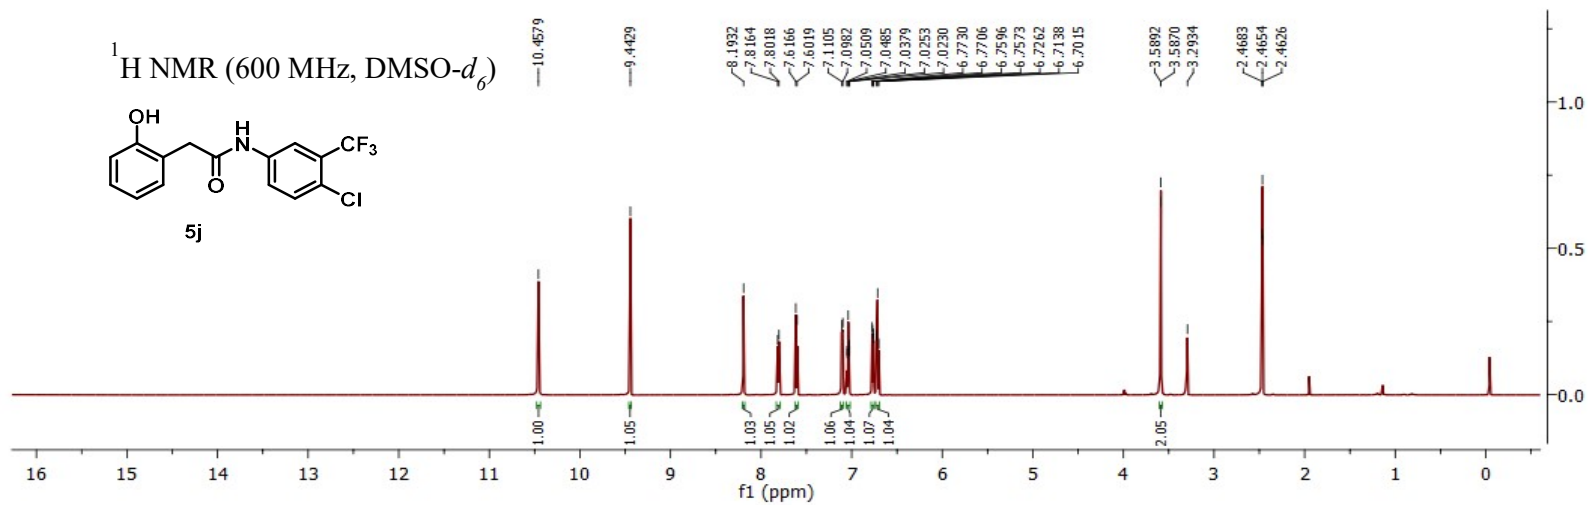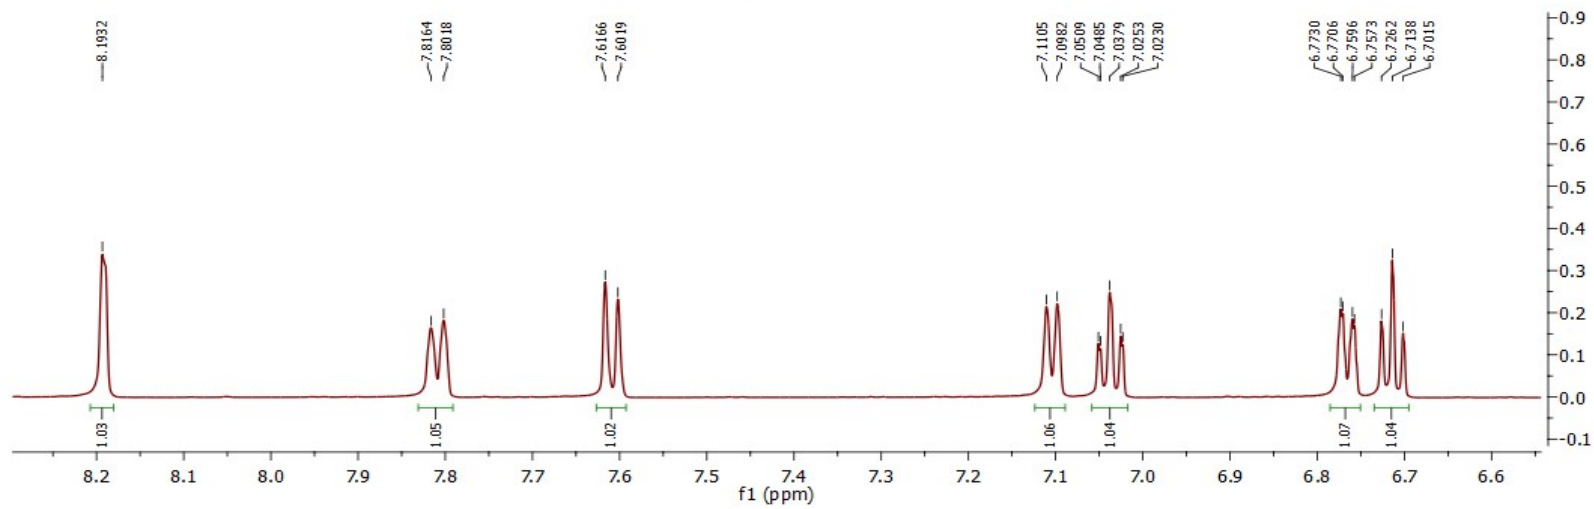

<sup>13</sup>C NMR (150 MHz, DMSO-*d*<sub>6</sub>)

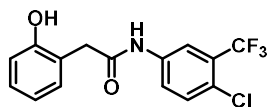

5j

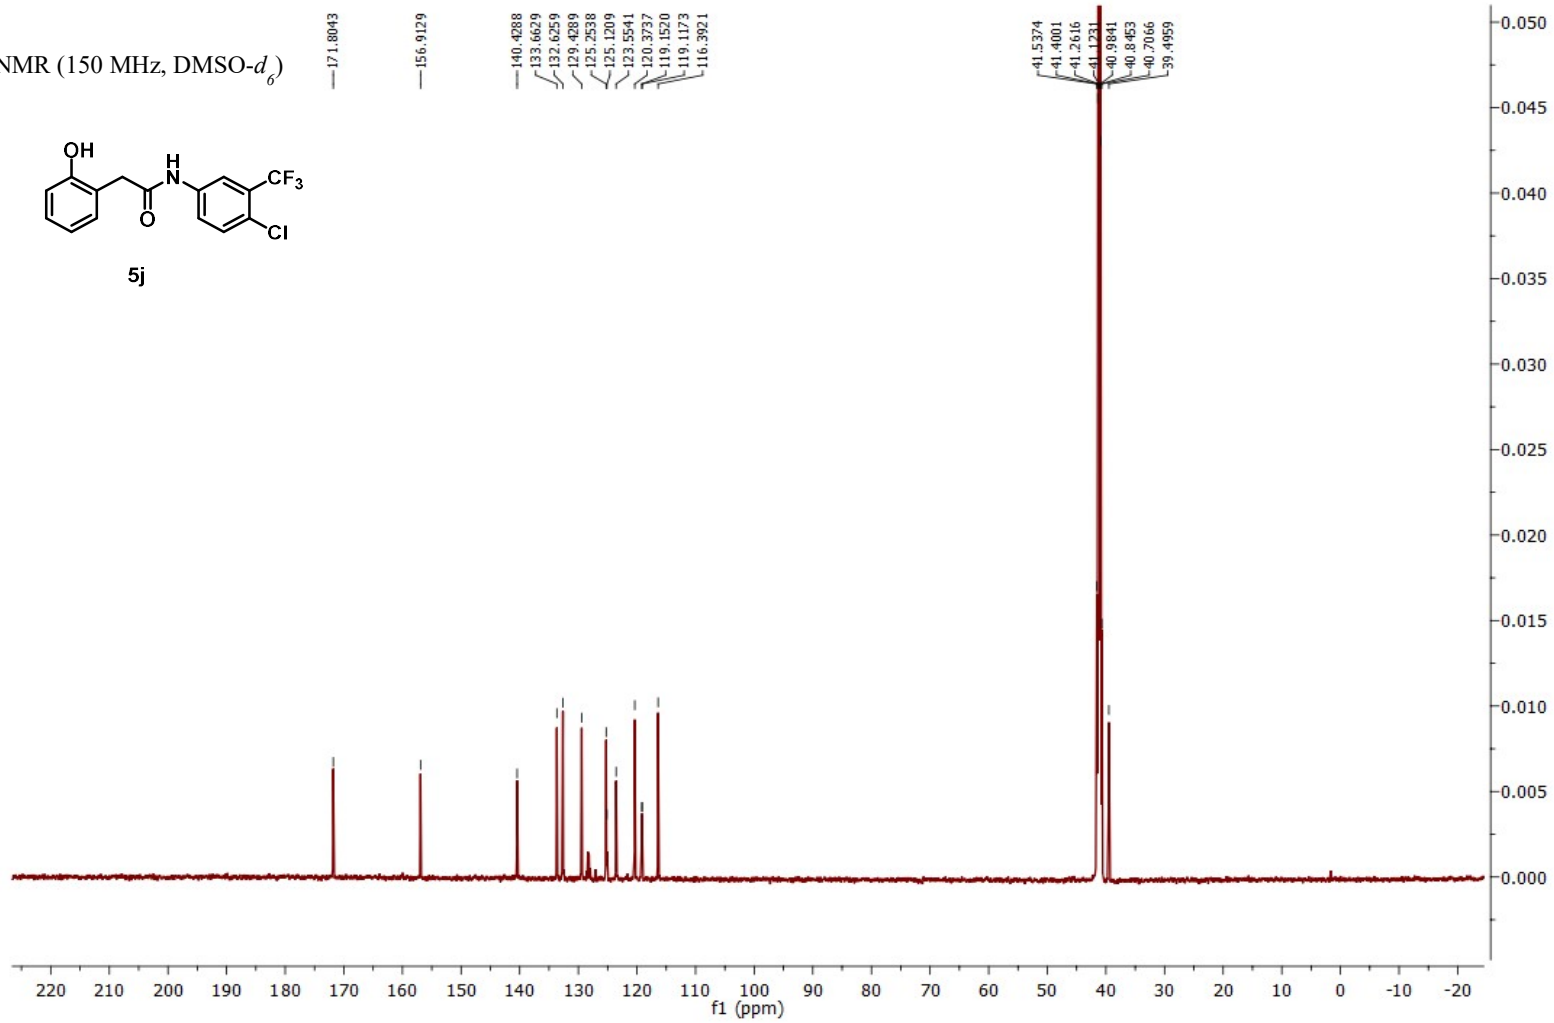

$^1\text{H}$  NMR (600 MHz,  $\text{DMSO-}d_6$ )

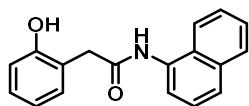

5k

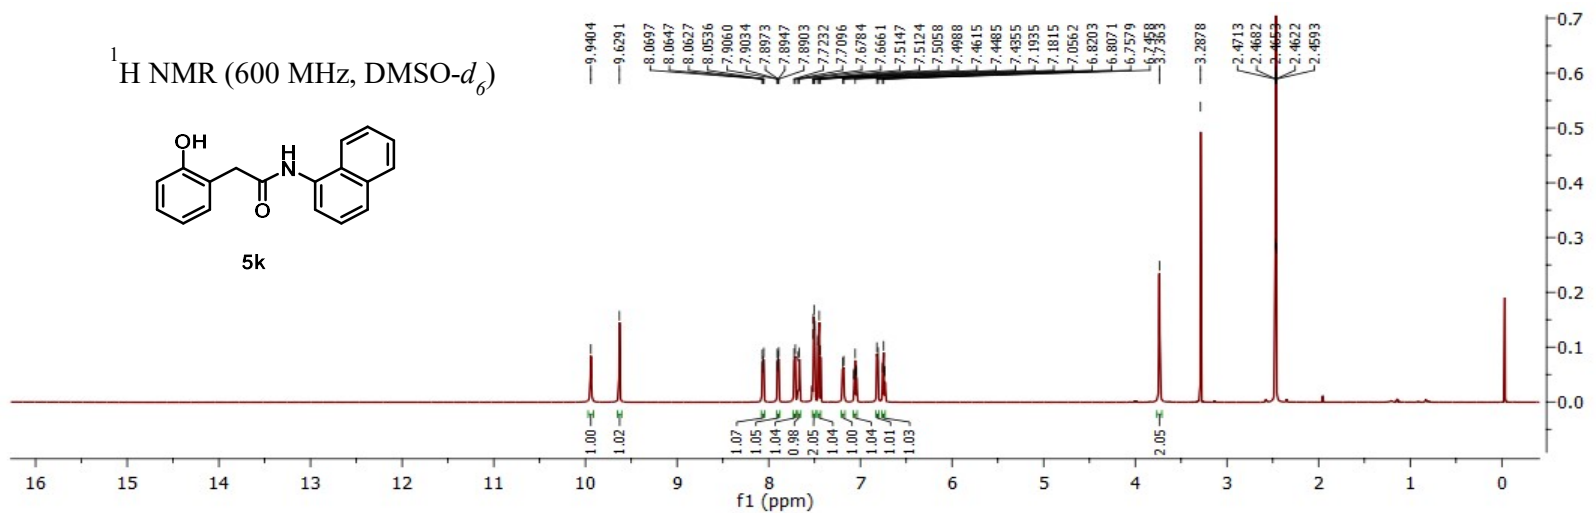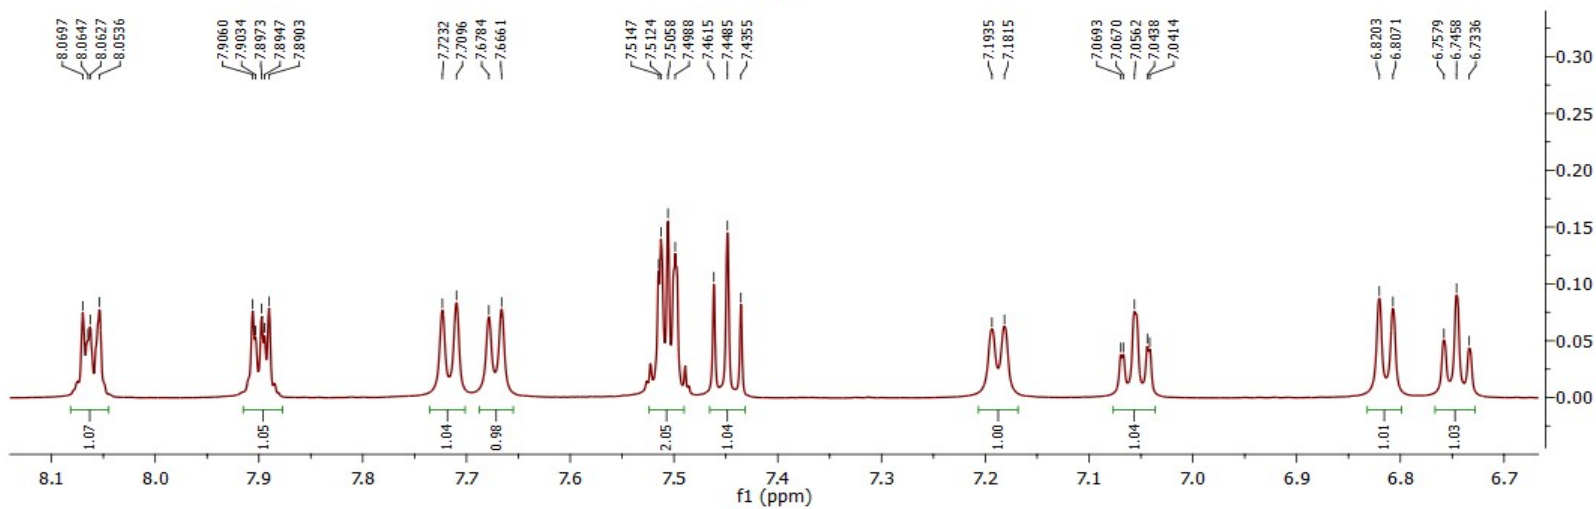

$^{13}\text{C}$  NMR (150 MHz,  $\text{DMSO-}d_6$ )

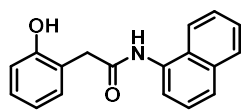

5k

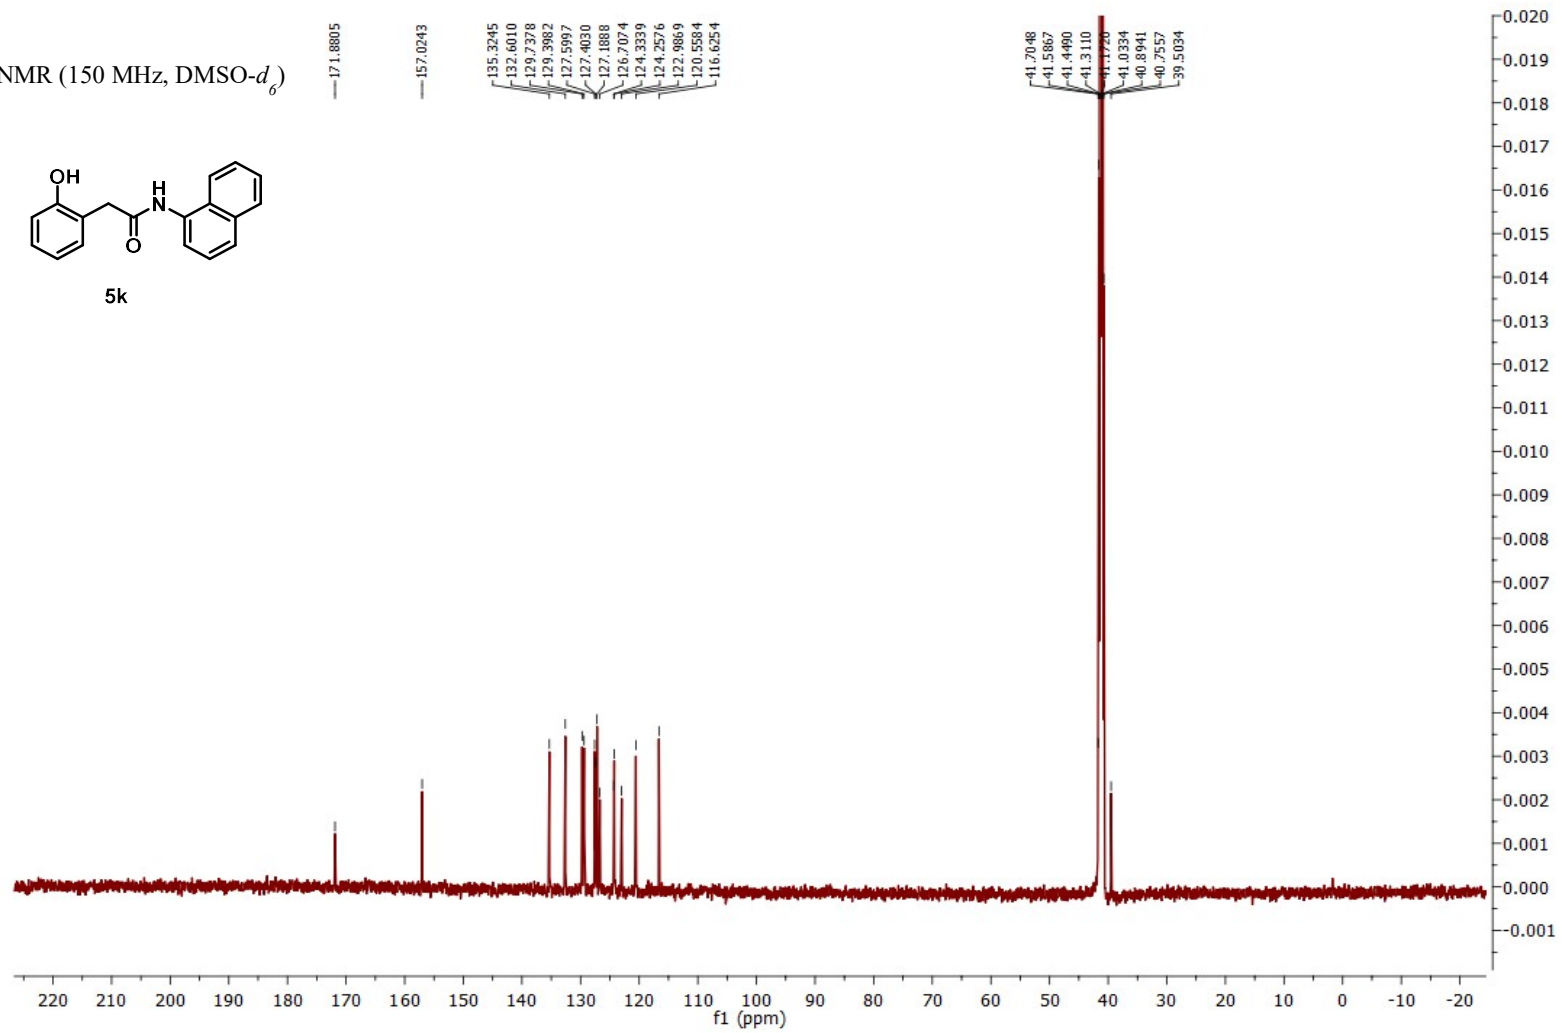

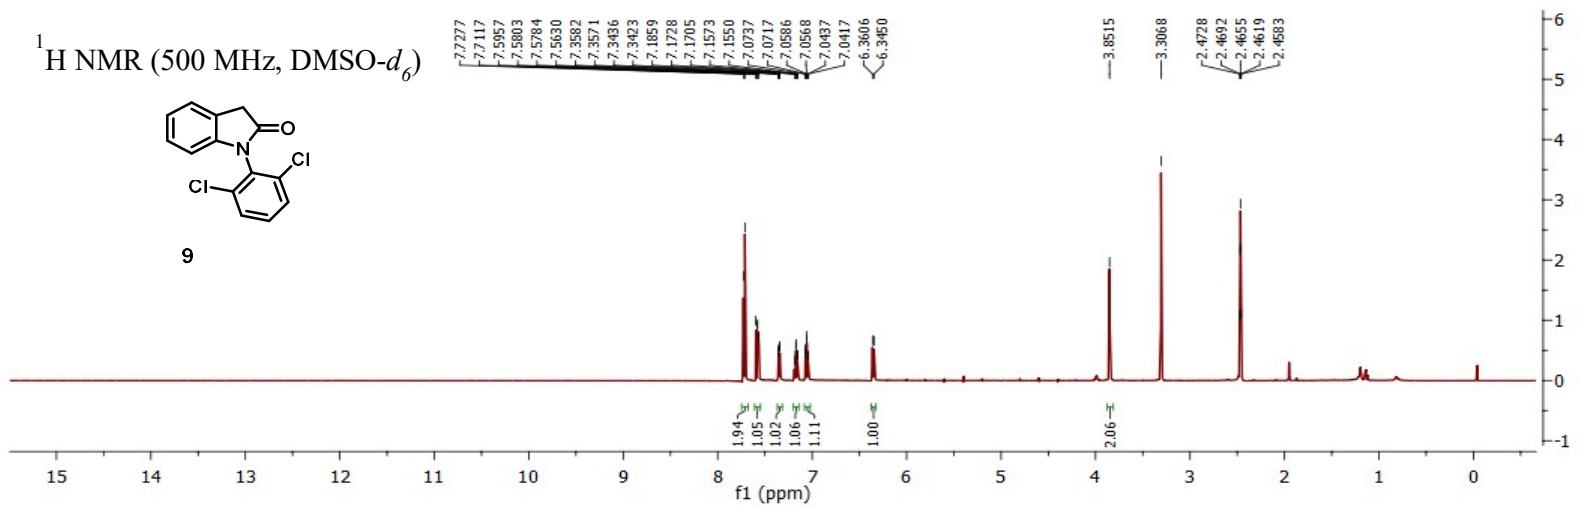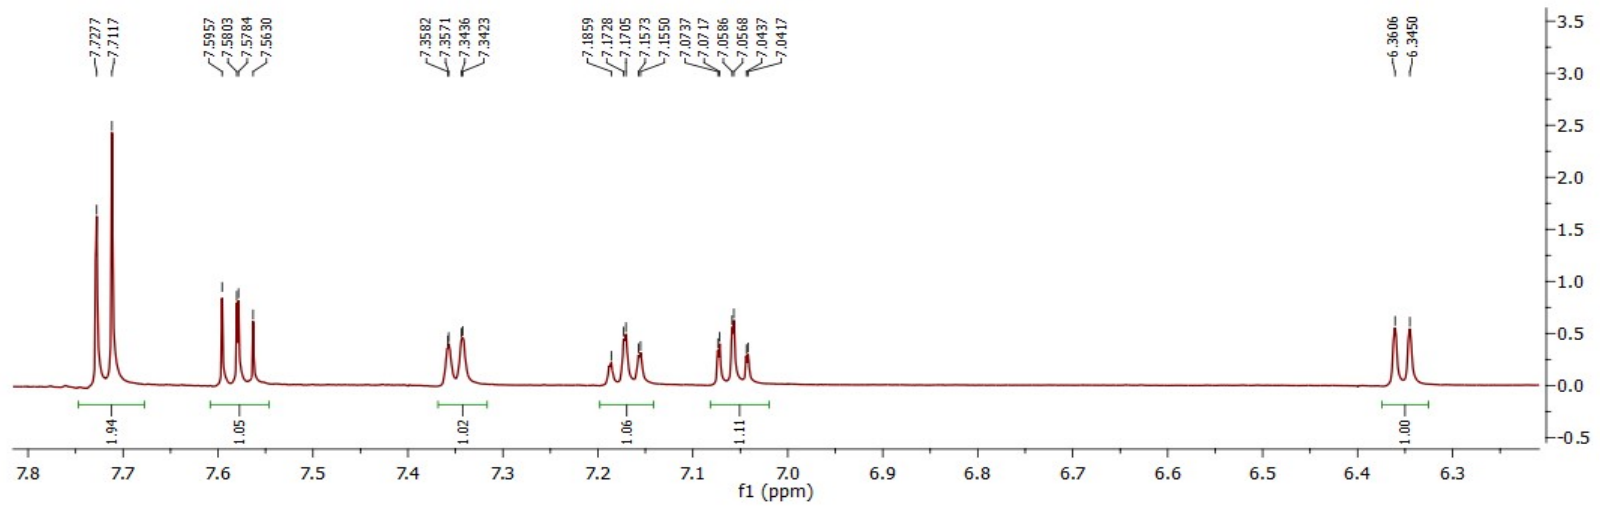



$^{13}\text{C}$  NMR (125 MHz,  $\text{DMSO-}d_6$ )

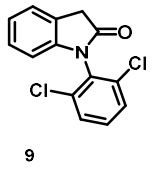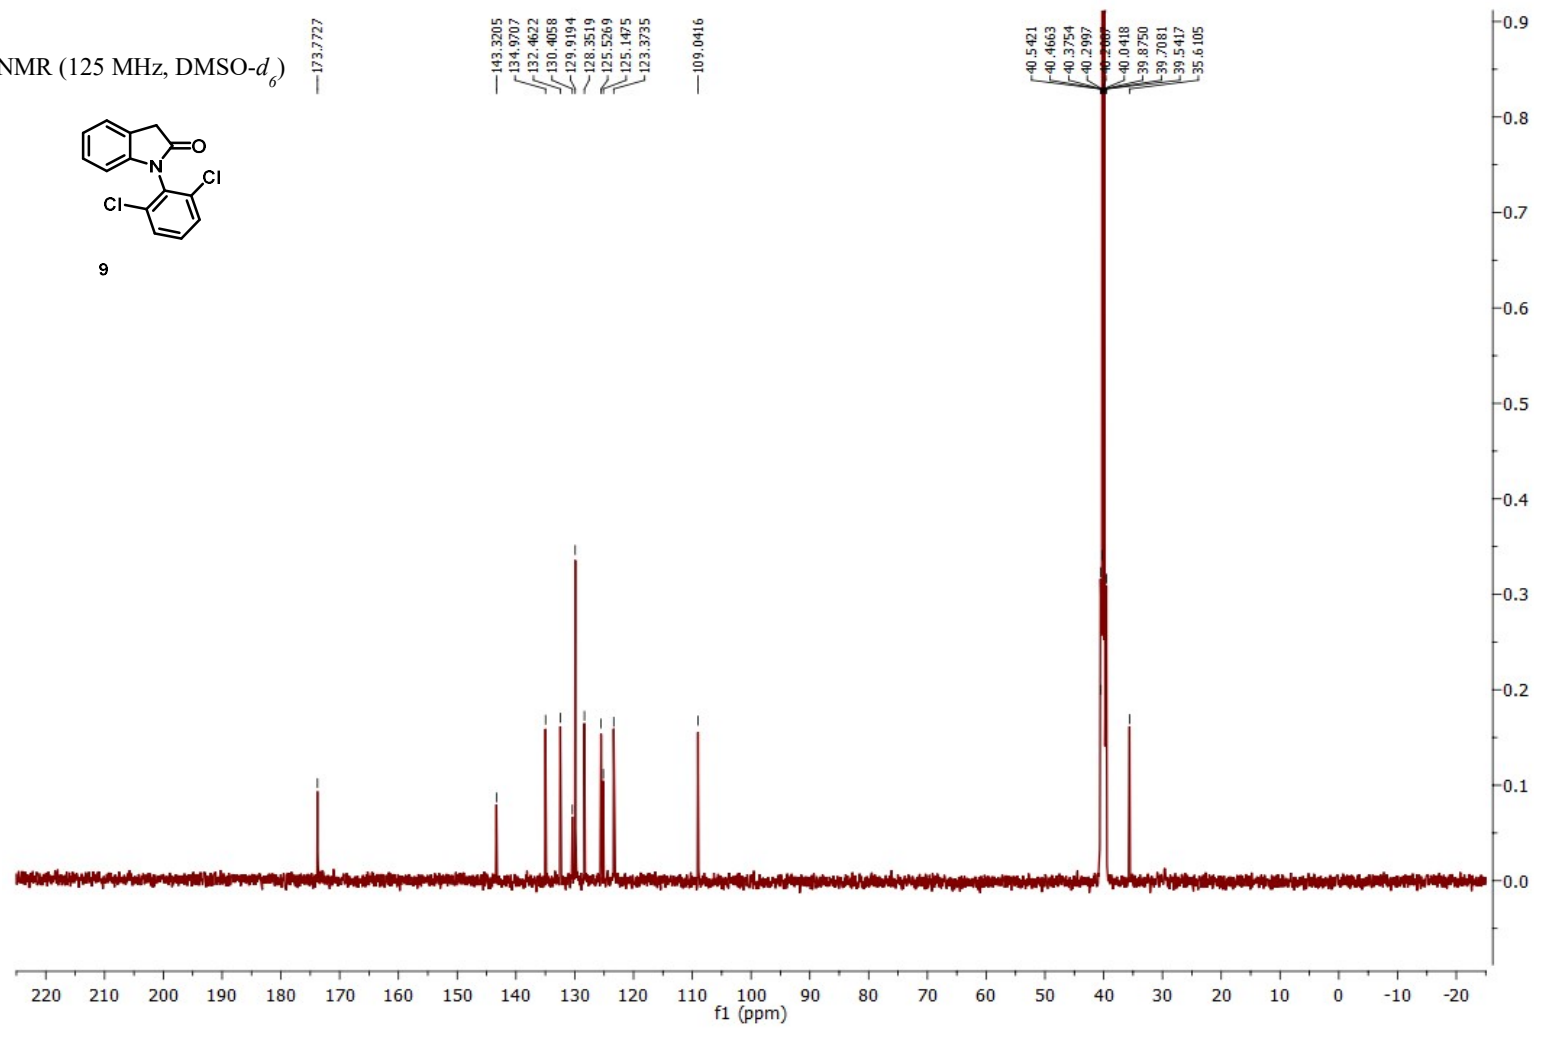

$^1\text{H}$  NMR (500 MHz,  $\text{CDCl}_3$ )

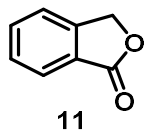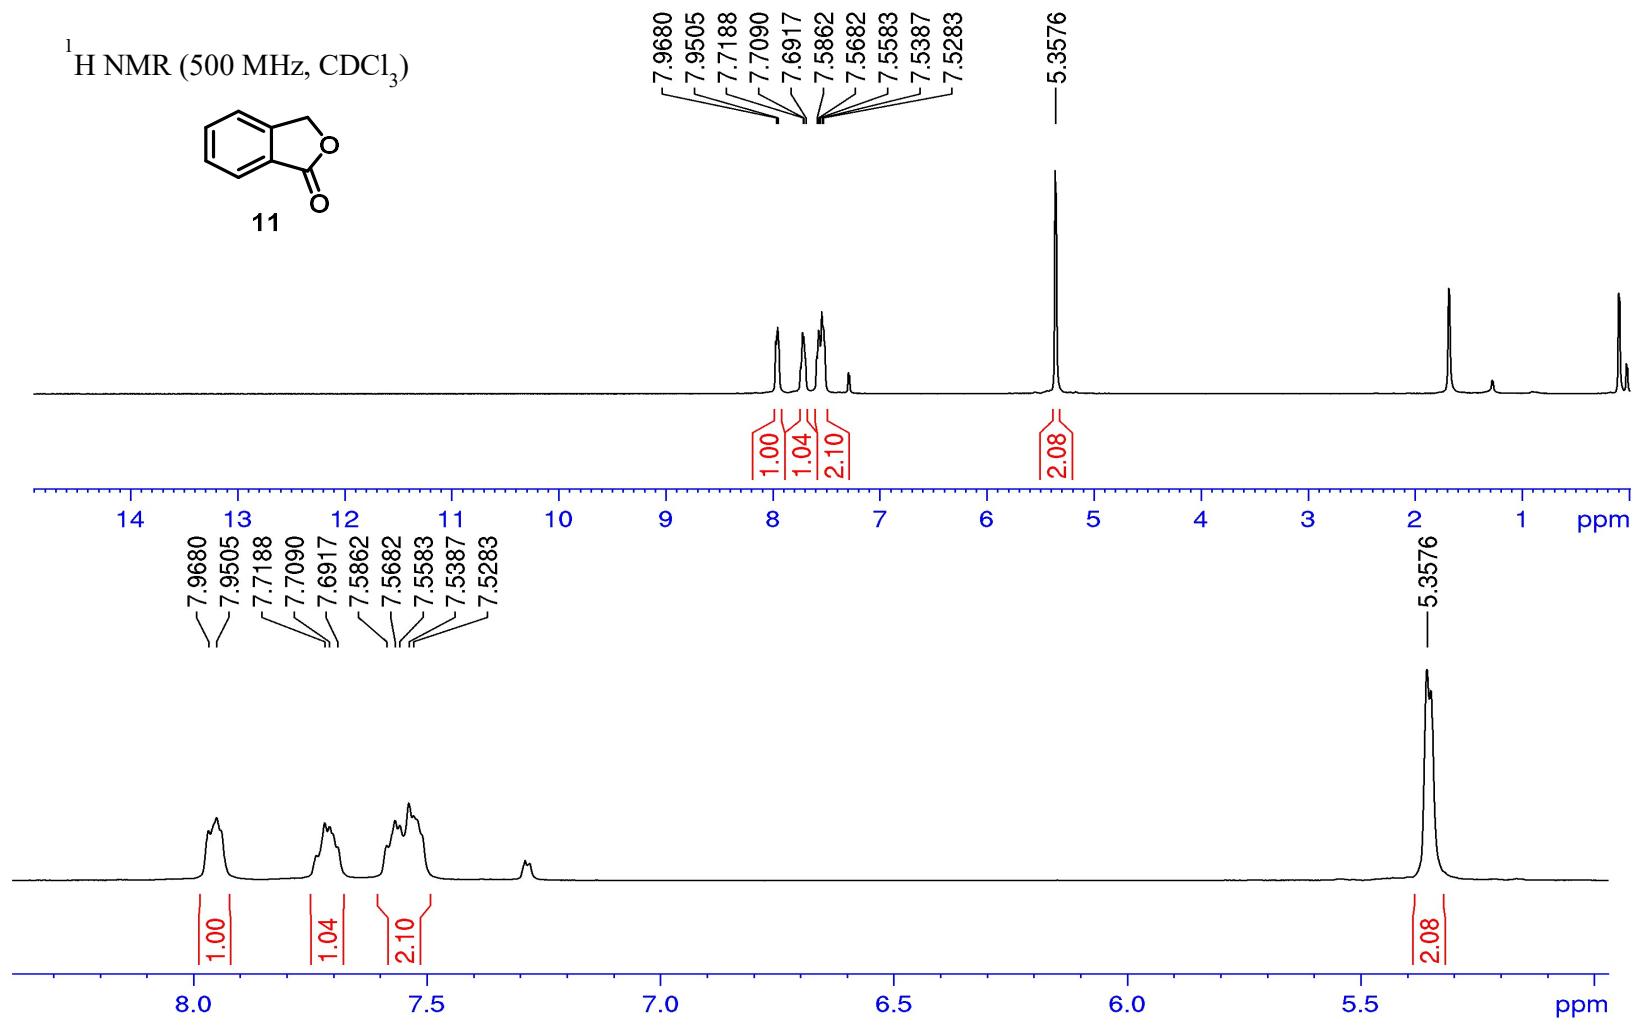

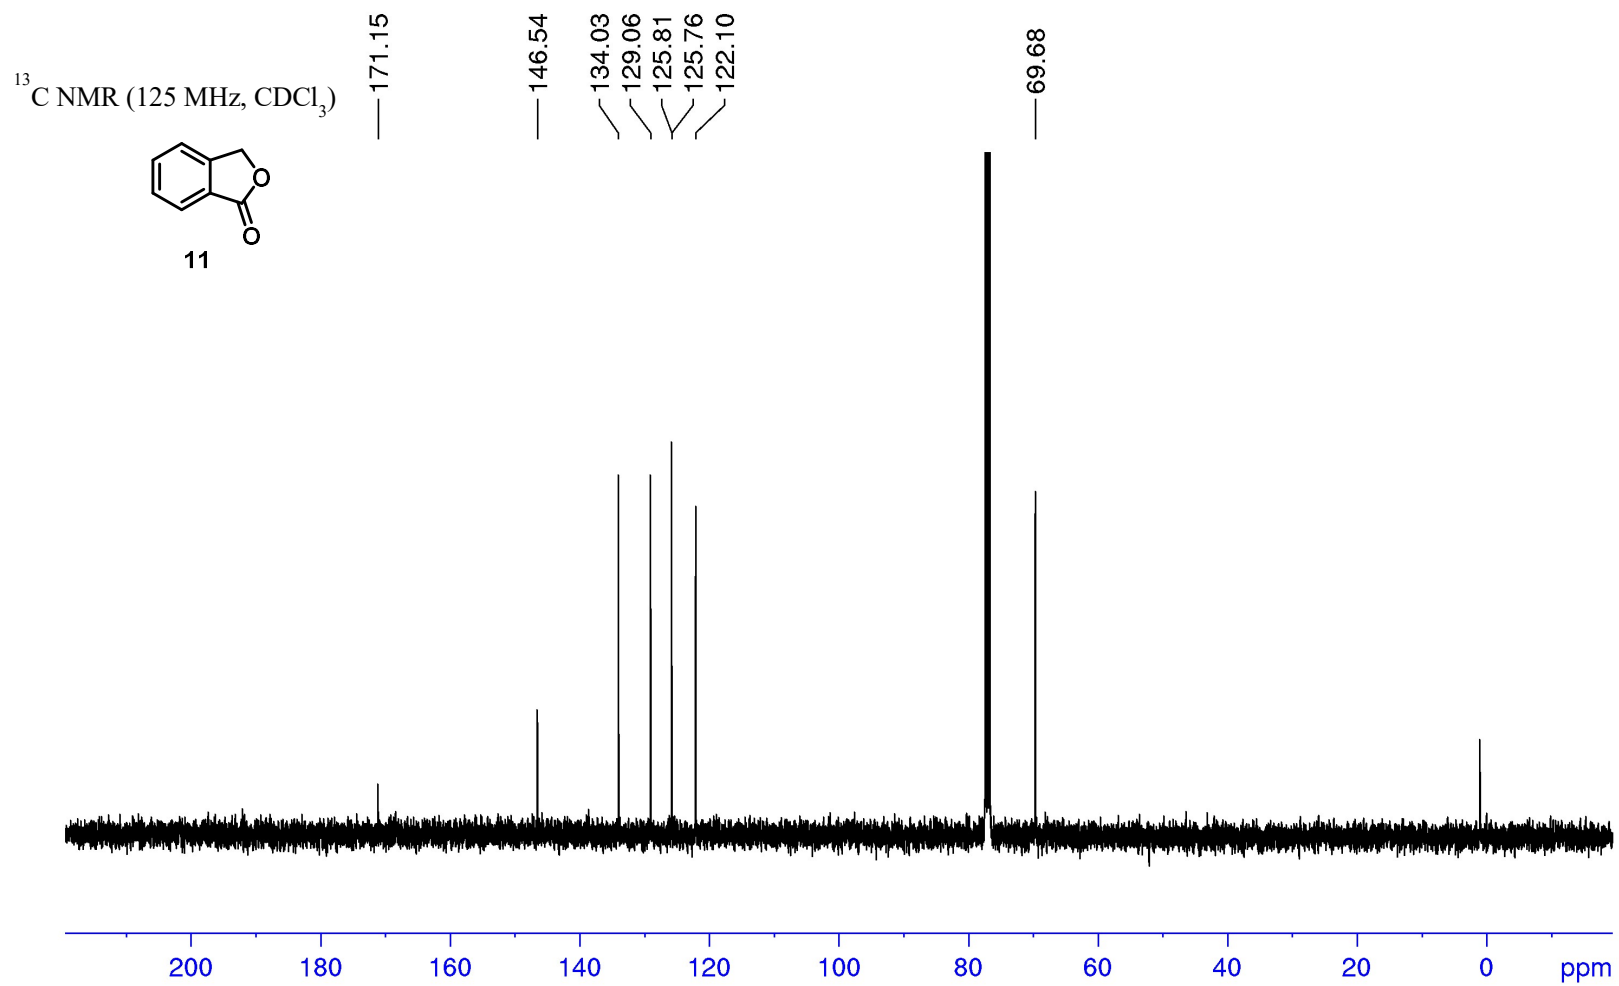

$^1\text{H}$  NMR (500 MHz,  $\text{CDCl}_3$ )

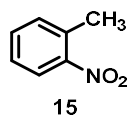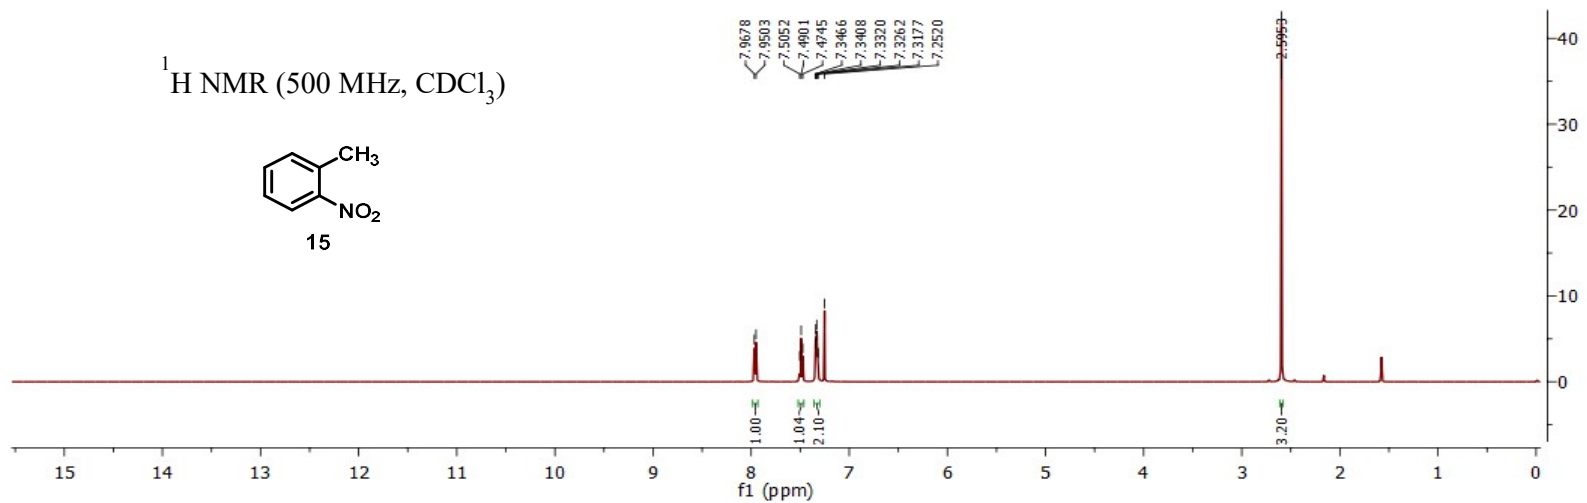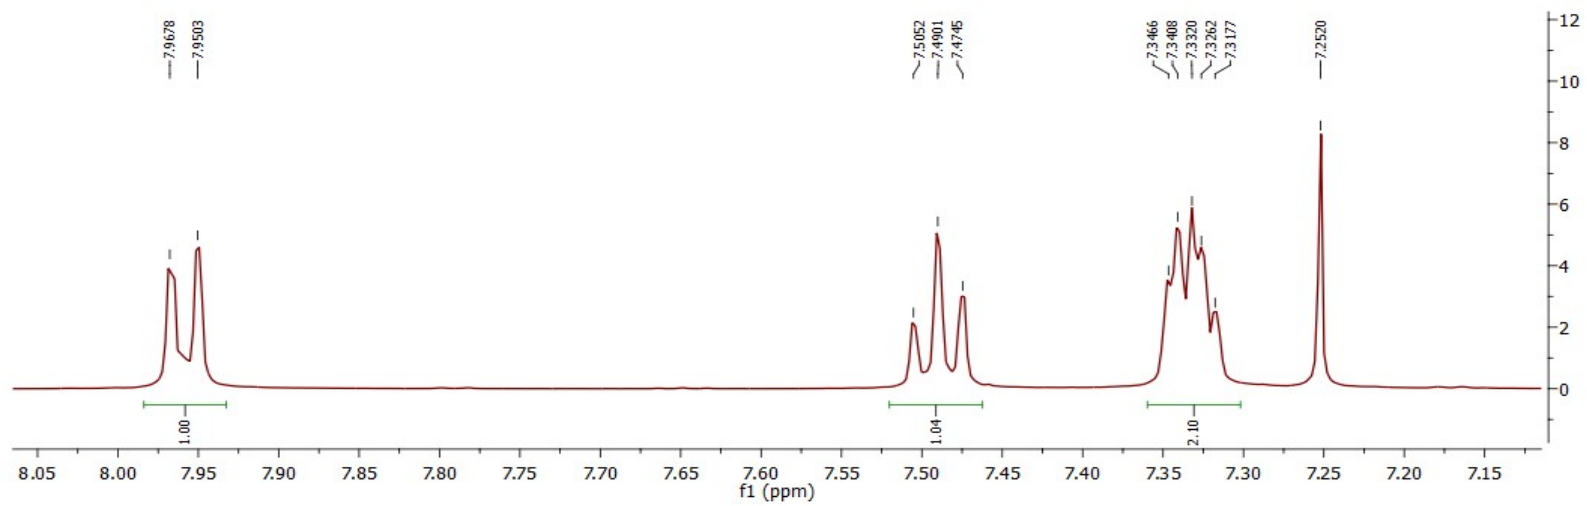

$^{13}\text{C}$  NMR (125 MHz,  $\text{CDCl}_3$ )

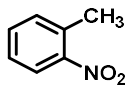

15

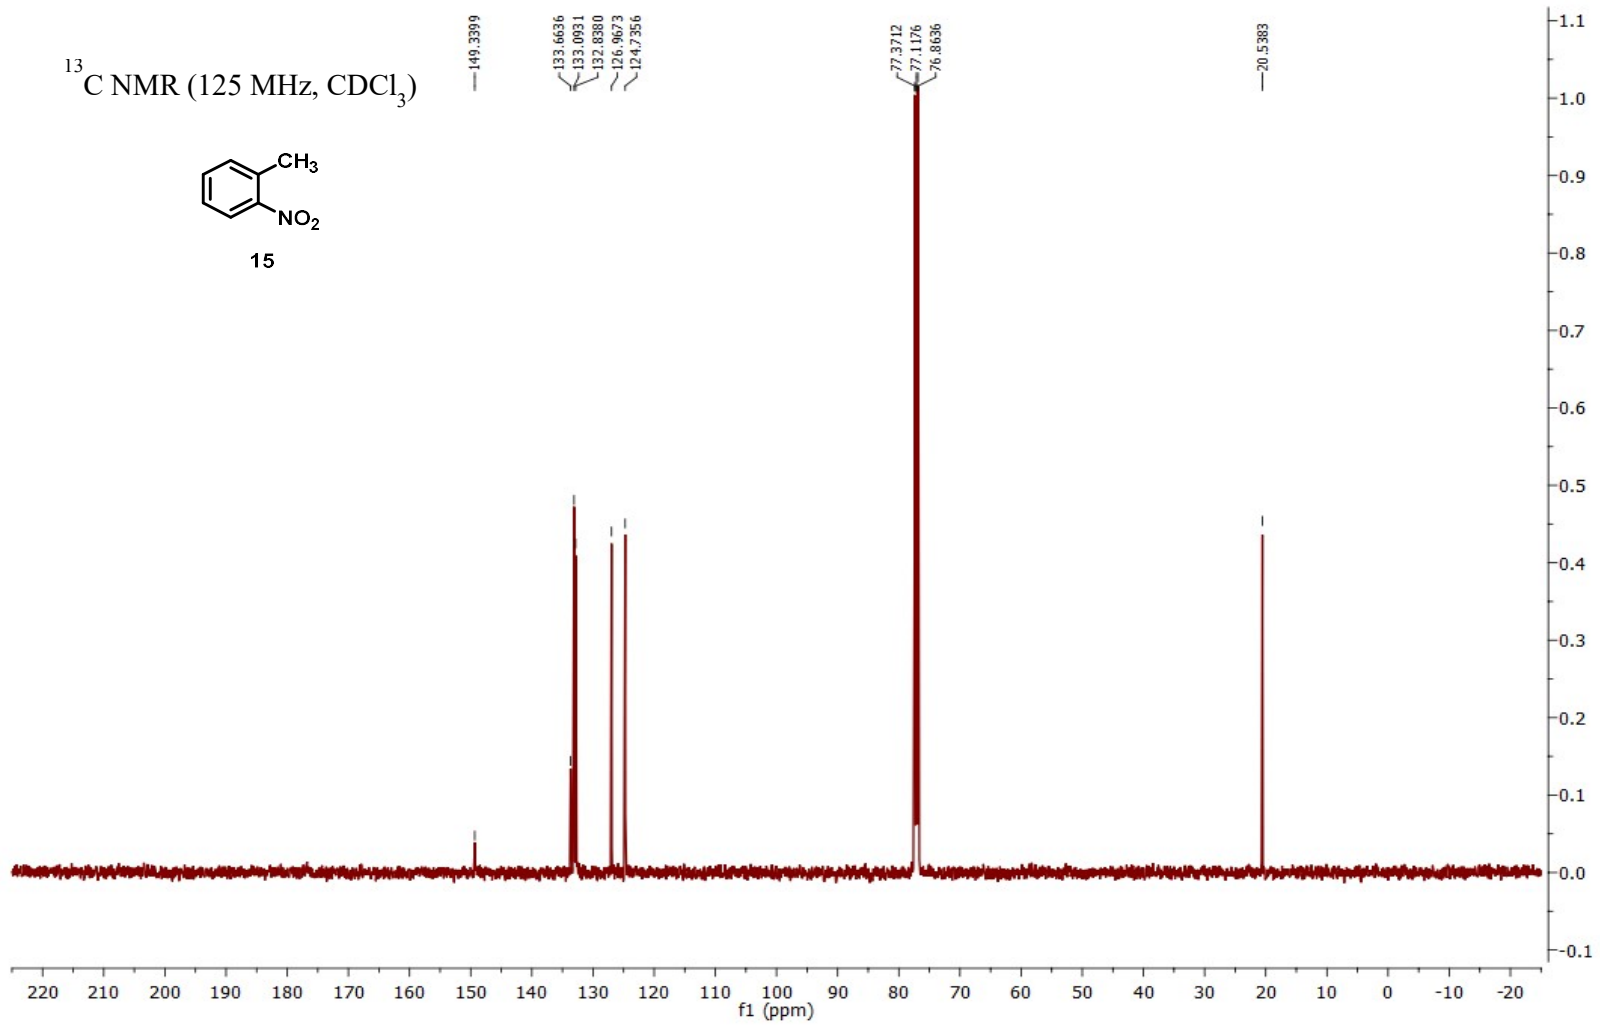

$^1\text{H}$  NMR (400 MHz,  $\text{CDCl}_3$ )

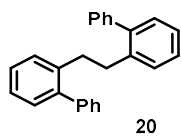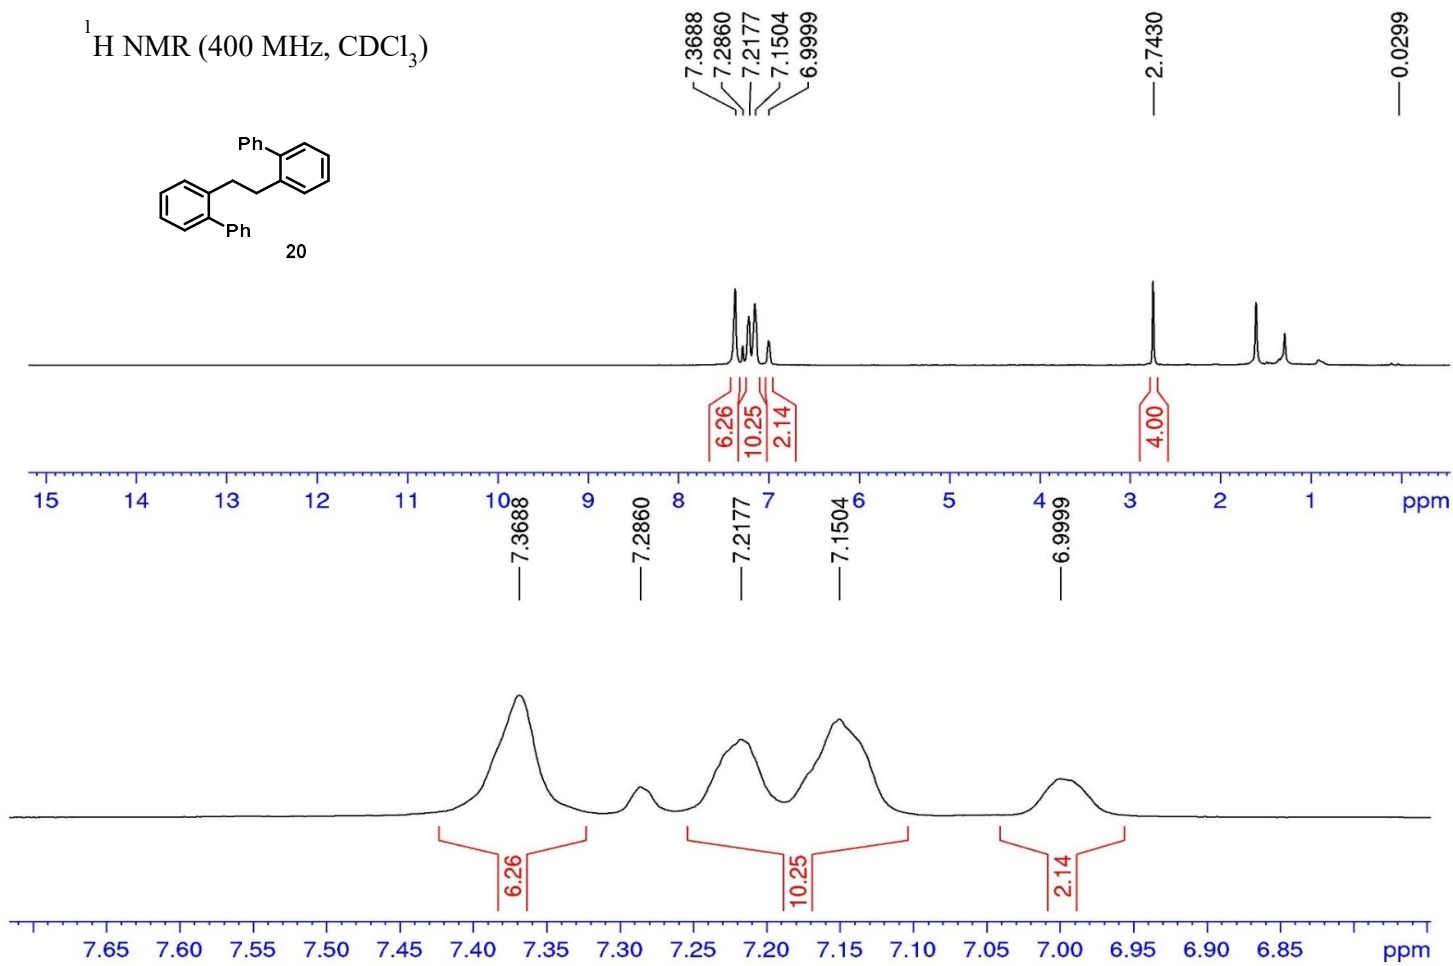

$^{13}\text{C}$  NMR (100 MHz,  $\text{CDCl}_3$ )

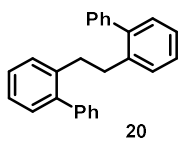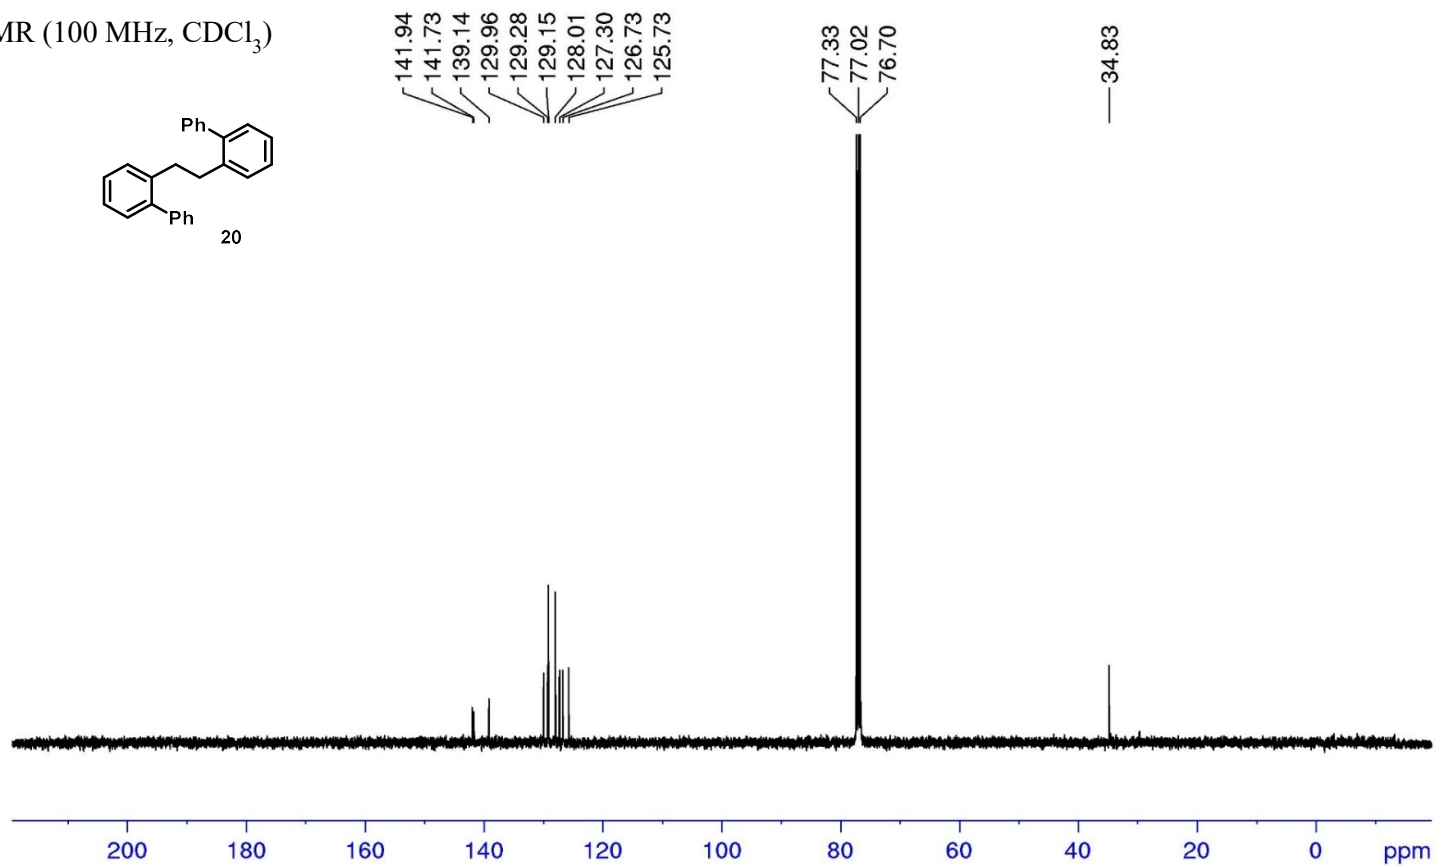

Supplement: d3nj02776g1.pdf [file d3nj02776g1.pdf]
